# Supplementary material for: An alkynylboronate cycloaddition strategy to functionalised benzyne derivatives
Source: Royal Society of Chemistry journal article supplement (doi:10.1039/c0cc01345e), 2010-01-01

## Supplementary Material

### An Alkynylboronate Cycloaddition Strategy to Functionalised Benzyne Precursors.

James D. Kirkham,<sup>†</sup> Patrick M. Delaney,<sup>†</sup> George J. Ellames,<sup>‡</sup> Eleanor C. Row,<sup>‡</sup>  
Joseph P. A. Harrity\*,<sup>†</sup>

<sup>†</sup>*Department of Chemistry, University of Sheffield, Sheffield, S3 7HF, U. K. and* <sup>‡</sup>*Sanofi Aventis,  
Willowburn Avenue, Alnwick, NE66 2JH, U. K.*

[j.harrity@sheffield.ac.uk](mailto:j.harrity@sheffield.ac.uk)

#### General Procedures

Infrared (IR) Spectra were recorded on a Perkin Elmer Paragon 100 FTIR spectrophotometer,  $\nu_{\max}$  in  $\text{cm}^{-1}$ . Samples were recorded as thin films using sodium chloride plates, as a DCM solution. Bands are characterised as broad (br), strong (s), medium (m), and weak (w).  $^1\text{H}$  NMR spectra were recorded on a Bruker AC-250 (250 MHz) or AMX-400 (400 MHz) supported by an Aspect 3000 data system, unless otherwise stated. Chemical shifts are reported in ppm from tetramethylsilane with the residual protic solvent resonance as the internal standard ( $\text{CHCl}_3$ :  $\delta 7.27$  ppm). Data are reported as follows: chemical shift, integration, multiplicity (s=singlet, d=doublet, q=quartet, pent=pentet, sext=sextet, br=broad, m=multiplet, app=apparent), coupling constants (Hz), and assignment.  $^{13}\text{C}$  NMR spectra were recorded on a Bruker AC-250 (62.9 MHz) or AMX-400 (100.6 MHz) with complete proton decoupling. Chemical shifts are reported in ppm from tetramethylsilane with the solvent as the internal reference ( $\text{CDCl}_3$ :  $\delta 77.0$  ppm). Low resolution mass spectra were recorded on Micromass Autospec, operating in E.I., C.I. or FAB mode; or a Perkin-Elmer Turbomass Benchtop GC-MS operating in either E.I. or C.I mode. High-resolution mass spectra (HRMS) recorded for accurate mass analysis, were performed on either a MicroMass LCT operating in Electrospray mode (TOF  $\text{ES}^+$ ) or a MicroMass Prospec operating in FAB ( $\text{FAB}^+$ ), EI ( $\text{EI}^+$ ) or CI ( $\text{CI}^+$ ) mode.

Melting points performed on recrystallised solids, were recorded on a Gallenkamp melting point apparatus and are uncorrected. All solvents and reagents were purified using standard laboratory techniques according to methods published in "Purification of Laboratory Chemicals" by Perrin, Armarego, and Perrin (Pergamon Press, 1966). Starting alkynylboronates<sup>1</sup> and pyranones<sup>2</sup> were prepared according to established procedures. Coumalic acid and methyl coumalate were purchased from Aldrich chemical co. and used as received. 3-Bromo-methyl coumalate was prepared as previously reported.<sup>3</sup> Flash chromatography was performed on silica gel (BDH Silica Gel 60 43-60). Thin layer chromatography (TLC) was performed on aluminium backed plates pre-coated with silica (0.2 mm, Merck DC-alufolien Kieselgel 60 F254) which were developed using standard visualizing agents: Ultraviolet light or potassium permanganate.

### General Procedure 1: The cycloaddition of halo-pyranones with trimethylsilylalkynyl boronic ester

A mixture of the pyranone (0.2 mmol) and trimethylsilylalkynylboronate (0.4 mmol) in mesitylene (0.2 mL) was heated at 155 °C and stirred for 16 h under N<sub>2</sub>. The product was purified by flash column chromatography (starting with petroleum ether, ending with 10% ethyl acetate in petroleum ether).

### Synthesis of (4-chloro-2-(4,4,5,5-tetramethyl-1,3,2-dioxaborolan-2-yl)phenyl)trimethylsilane 10a and (5-chloro-2-(4,4,5,5-tetramethyl-1,3,2-dioxaborolan-2-yl)phenyl)trimethylsilane 10b

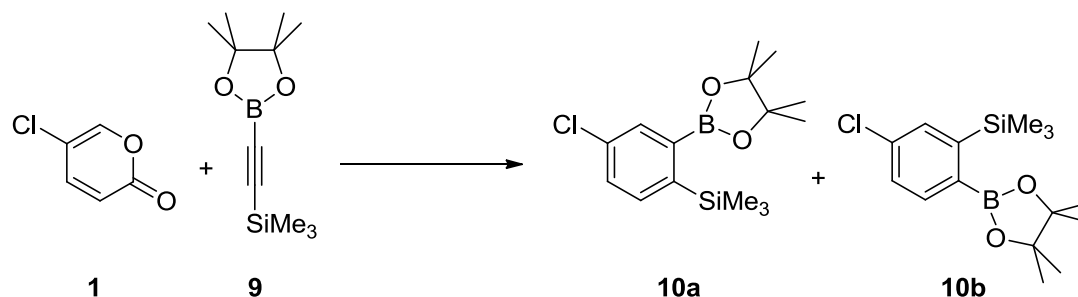

<sup>1</sup> H.C. Brown, N.G. Bhat, M. Srebink, *Tetrahedron Lett.* **1982**, 29, 2631.

<sup>2</sup> (a) Afarinkia, K.; Bearpark, M.J.; Ndibwami, A. *J. Org. Chem.* **2005**, 70, 1122. (b) Afarinkia, K.; Bearpark, M.J.; Ndibwami, A. *J. Org. Chem.* **2003**, 68, 7158. (c) Cho, C.-G.; Park, J.-S.; Jung, I.-H.; Lee, H. *Tetrahedron Lett.* **2001**, 42, 1065. (d) Posner, G.H.; Afarinkia, K.; Dai, H. *Org. Synth.* **1995**, 73, 231. (e) Kvita, V.; Sauter, H. *Helv. Chim. Acta* **1990**, 73, 883. (f) Ashworth, I.W.; Bowden, M.C.; Dembofsky, B.; Levin, D.; Moss, W.; Robinson, E.; Szczur, N.; Virica, J. *Org. Process Res. Dev.* **2003**, 7, 74.

<sup>3</sup> Delaney, P.M.; Browne, D.L.; Adams, H.; Plant, A.; Harrity, J.P.A. *Tetrahedron* **2008**, 64, 866.

Using General Procedure 1, with pyranone **1** (25 mg, 0.19 mmol), the product was isolated as an inseparable mixture of compounds **10a** and **10b** (4:3 ratio), as a clear oil, 41 mg, 70% yield.

$^1\text{H}$  NMR (250 MHz,  $\text{CDCl}_3$ ): **10a**:  $\delta$  0.35 (9H, s, Si- $\text{CH}_3$ ), 1.38 (12H, s,  $\text{CH}_3$ ), 7.38 (1H, dd,  $J = 2.0, 8.0$  Hz, Ar- $H$ ), 7.55 (1H, d,  $J = 8.0$  Hz, Ar- $H$ ), 7.89 (1H, d,  $J = 2.0$  Hz, Ar- $H$ ); **10b**:  $\delta$  0.37 (9H, s, Si- $\text{CH}_3$ ), 1.38 (12H, s,  $\text{CH}_3$ ), 7.34 (1H, dd,  $J = 2.0, 8.0$  Hz, Ar- $H$ ), 7.57 (1H, d,  $J = 2.0$  Hz, Ar- $H$ ), 7.87 (1H, d,  $J = 8.0$  Hz, Ar- $H$ ).  $^{13}\text{C}$  NMR (62.9 MHz,  $\text{CDCl}_3$ ): **10a/b**:  $\delta$  0.0, 0.1, 24.6 (x2), 83.6, 86.9, 127.4, 129.2, 130.7, 132.3, 133.8, 135.0, 135.4, 135.5, 136.3, 137.3. FTIR ( $\text{CH}_2\text{Cl}_2$ , thin film): 2980 (s), 1570 (m), 1388 (s), 1340 (s), 1145 (s), 845 (s)  $\text{cm}^{-1}$ . HRMS calculated for  $\text{C}_{15}\text{H}_{24}\text{B}^{35}\text{ClO}_2\text{Si}$  ( $\text{EI}^+$ ): 310.1327. Found: 310.1335.

**Synthesis of (4-chloro-2-(4,4,5,5-tetramethyl-1,3,2-dioxaborolan-2-yl)phenyl)trimethylsilane 10a and (5-chloro-2-(4,4,5,5-tetramethyl-1,3,2-dioxaborolan-2-yl)phenyl)trimethylsilane 10b**

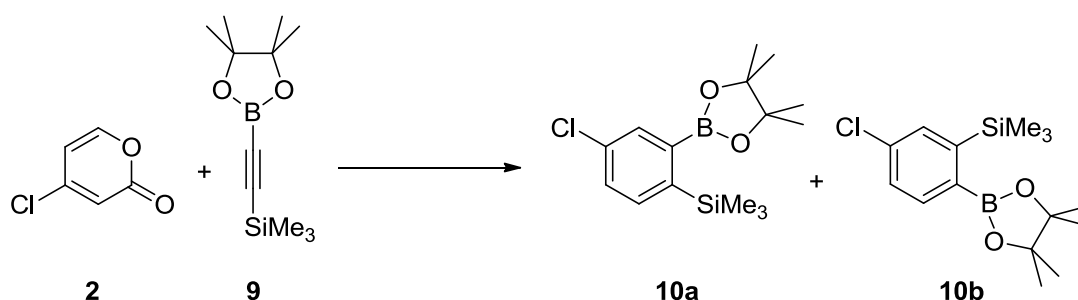

Using General Procedure 1, with pyranone **2** (25 mg, 0.19 mmol), the product was isolated as an inseparable mixture of compounds **10a** and **10b** (3:5 ratio), as a clear oil, 40 mg, 70% yield. The mixture provided the same spectroscopic data as for the compounds above.

**Synthesis of (4-bromo-2-(4,4,5,5-tetramethyl-1,3,2-dioxaborolan-2-yl)phenyl)trimethylsilane 11a and (5-bromo-2-(4,4,5,5-tetramethyl-1,3,2-dioxaborolan-2-yl)phenyl)trimethylsilane 11b**

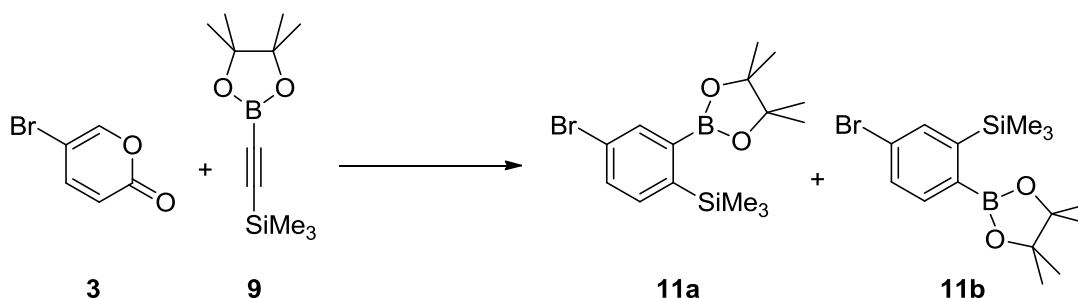

Using General Procedure 1, with pyranone **3** (50 mg, 0.29 mmol), the product was isolated as an inseparable mixture of compounds **11a** and **11b** (3:2 ratio), as a clear oil, 82 mg, 80% yield.

$^1\text{H}$  NMR (400 MHz,  $\text{CDCl}_3$ ): **11 a or b**:  $\delta$  0.36 (9H, s, Si- $\text{CH}_3$ ), 1.38 (12H, s,  $\text{CH}_3$ ), 7.50 (1H, m, Ar- $H$ ), 7.54 (1H, m, Ar- $H$ ), 8.06 (1H, d,  $J = 2.0$  Hz, Ar- $H$ ); **11 a or b**:  $\delta$  0.38 (9H, s, Si- $\text{CH}_3$ ), 1.38 (12H, s,  $\text{CH}_3$ ), 7.48 (1H, m, Ar- $H$ ), 7.74 (1H, d,  $J = 2.0$  Hz, Ar- $H$ ), 7.80 (1H, d,  $J = 8.0$  Hz, Ar- $H$ ).  $^{13}\text{C}$  NMR (62.9 MHz,  $\text{CDCl}_3$ ): **11a/b**:  $\delta$  0.5 (x2), 25.0 (x2), 84.0, 84.2, 123.4, 125.9, 130.8, 132.6, 136.0, 137.0, 137.9, 138.7, 145.6, 150.3. FTIR ( $\text{CH}_2\text{Cl}_2$ , thin film): 2980 (s), 2977 (w), 1454 (w)  $\text{cm}^{-1}$ . HRMS calculated for  $\text{C}_{15}\text{H}_{24}\text{B}^{79}\text{BrO}_2\text{Si}$  ( $\text{EI}^+$ ): 355.1504. Found: 355.1507.

**Synthesis of 2-(2,4-dichloro-6-trimethylsilylanyl-phenyl)-4,4,5,5-tetramethyl-[1,3,2]dioxaborolane 12a and 2-(3,5-dichloro-2-trimethylsilylanyl-phenyl)-4,4,5,5-tetramethyl-[1,3,2]dioxaborolane 12b**

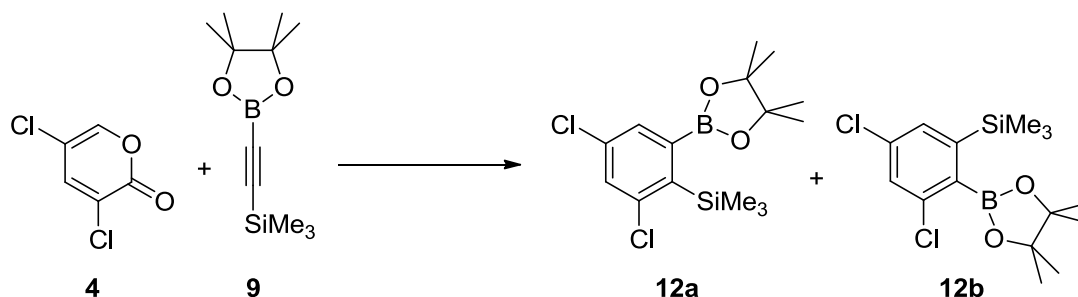

Using General Procedure 1, with pyranone **4** (25 mg, 0.15 mmol), the product was isolated as an inseparable mixture of compounds **12a** and **12b** (1:1 ratio), as a clear oil, 37 mg, 71% yield.

$^1\text{H}$  NMR (250 MHz,  $\text{CDCl}_3$ ): **12a/b**:  $\delta$  0.36 (9H, s, Si- $\text{CH}_3$ ), 0.43 (9H, s, Si- $\text{CH}_3$ ), 1.39 (12H, s,  $\text{CH}_3$ ), 1.45 (12H, s,  $\text{CH}_3$ ), 7.34 – 7.44 (4H, m, Ar- $\text{H}$ ).  $^{13}\text{C}$  NMR (62.9 MHz,  $\text{CDCl}_3$ ): **12a/b**:  $\delta$  0.0, 1.7, 25.3, 25.8, 84.6, 84.9, 113.2, 115.6, 119.1, 128.7, 130.3, 131.9 (x2), 135.0, 135.3, 138.7. FTIR ( $\text{CH}_2\text{Cl}_2$ , thin film): 2981 (s), 1562 (m), 1318 (s), 1142 (s), 1050 (m), 846 (s)  $\text{cm}^{-1}$ . HRMS calculated for  $\text{C}_{15}\text{H}_{23}\text{B}^{35}\text{Cl}_2\text{O}_2\text{Si}$  ( $\text{EI}^+$ ): 344.0937. Found: 344.0932.

### General Procedure 2: The cycloaddition of nitrile-pyranones with trimethylsilyl alkynyl boronic ester

A mixture of the pyranone (0.2 mmol) and trimethylsilyl alkynyl boronate (0.4 mmol) in *o*-dichlorobenzene (0.2 mL) was heated at 175 °C and stirred for 18 h under  $\text{N}_2$ . The product was purified by flash column chromatography (starting with petroleum ether, ending with 10% ethyl acetate in petroleum ether).

### Synthesis of 3-(4,4,5,5-tetramethyl-[1,3,2]dioxaborolan-2-yl)-4-trimethylsilylbenzonitrile **15a** and 4-(4,4,5,5-tetramethyl-[1,3,2]dioxaborolan-2-yl)-3-trimethylsilylbenzonitrile **15b**

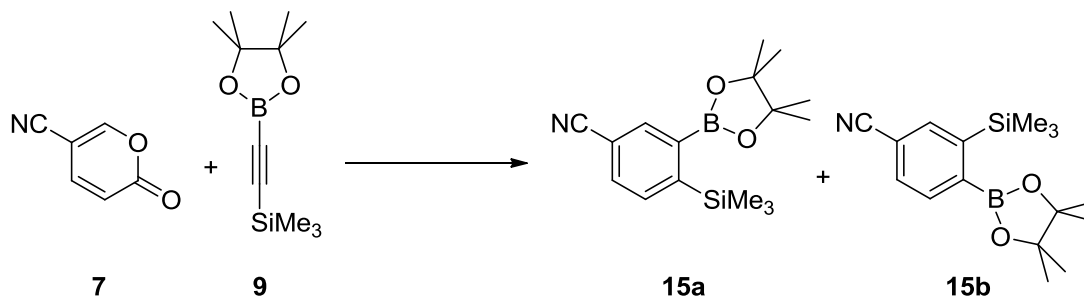

Using General Procedure 2, with pyranone **7** (25 mg, 0.21 mmol), the product was isolated as an inseparable mixture of compounds **15a** and **15b** (1:1 ratio), as a clear oil, 62 mg, 99% yield.

$^1\text{H}$  NMR (250 MHz,  $\text{CDCl}_3$ ): **15a/b**:  $\delta$  0.37 (18H, s, Si- $\text{CH}_3$ ), 1.38 (24H, s,  $\text{CH}_3$ ), 7.60 – 7.73 (3H, m, Ar- $\text{H}$ ), 7.85 (1H, d,  $J = 1.0$  Hz, Ar- $\text{H}$ ), 7.98 (1H, d,  $J = 7.5$  Hz, Ar- $\text{H}$ ), 8.17 (1H, d,  $J = 1.0$  Hz, Ar- $\text{H}$ ).  $^{13}\text{C}$  NMR (62.9 MHz,  $\text{CDCl}_3$ ): **15a/b**:  $\delta$  0.0, 0.1, 24.7 (x2), 84.3 (x2), 111.6, 113.1, 118.8, 119.1, 130.6, 132.1, 134.3, 135.8, 137.0, 138.7, 148.4, 153.4. FTIR ( $\text{CH}_2\text{Cl}_2$ , thin film): 2980 (s), 2229 (s), 1342 (s), 1143 (s), 1053 (m), 843 (s)  $\text{cm}^{-1}$ . HRMS calculated for  $\text{C}_{16}\text{H}_{24}\text{BNO}_2\text{Si}$  ( $\text{EI}^+$ ): 302.1748. Found: 302.1735.

Synthesis of **15a** and **15b** was also performed on gram scale: Using General Procedure 2, with pyranone **7** (0.50 g, 4.13 mmol), the product was isolated as an inseparable mixture of compounds **15a** and **15b** (1:1 ratio), as a clear oil, 1.28 g, quant.

**Synthesis of 3-bromo-5-(4,4,5,5-tetramethyl-[1,3,2]dioxaborolan-2-yl)-4-trimethylsilyl-benzonitrile 16a and 3-bromo-4-(4,4,5,5-tetramethyl-[1,3,2]dioxaborolan-2-yl)-5-trimethylsilyl-benzonitrile 16b**

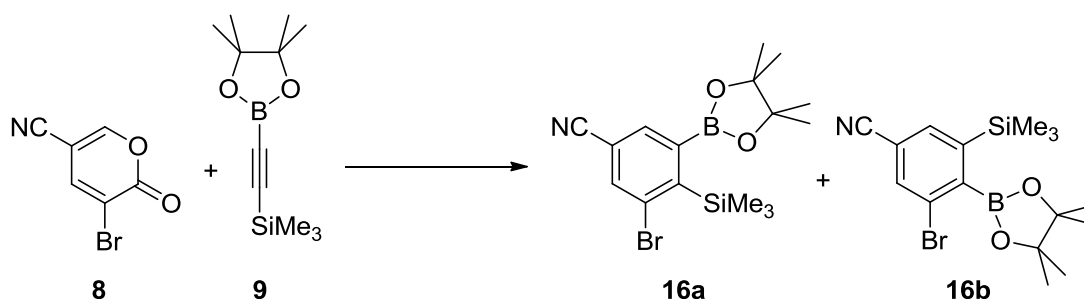

Using General Procedure 2, with pyranone **8** (25 mg, 0.13 mmol), the product was isolated as an inseparable mixture of compounds **16a** and **16b** (1:1 ratio), as a clear oil, 46 mg, 96% yield.

$^1\text{H}$  NMR (250 MHz,  $\text{CDCl}_3$ ): **16a/b**:  $\delta$  0.38 (9H, s, Si- $\text{CH}_3$ ), 0.48 (9H, s, Si- $\text{CH}_3$ ), 1.39 (12H, s,  $\text{CH}_3$ ), 1.48 (12H, s,  $\text{CH}_3$ ), 7.71 (1H, d,  $J = 1.5$  Hz, Ar- $H$ ), 7.75 (1H, d,  $J = 1.5$  Hz, Ar- $H$ ), 7.77 (1H, d,  $J = 1.5$  Hz, Ar- $H$ ), 7.81 (1H, d,  $J = 1.5$  Hz, Ar- $H$ ).  $^{13}\text{C}$  NMR (62.9 MHz,  $\text{CDCl}_3$ ): **16a/b**:  $\delta$  0.0, 1.9, 25.5, 26.1, 85.1, 85.6, 113.5, 113.8, 117.6, 117.9, 127.9, 131.3, 131.5, 134.8, 135.2, 135.3, 136.5, 149.0. FTIR ( $\text{CH}_2\text{Cl}_2$ , thin film): 2981 (s), 2232 (m), 1332 (s), 1140 (s), 1048 (m), 847 (s)  $\text{cm}^{-1}$ . HRMS calculated for  $\text{C}_{16}\text{H}_{23}\text{B}^{79}\text{BrNO}_2\text{Si}$  ( $\text{EI}^+$ ): 379.0774. Found: 379.0777.

**General Procedure 3: The oxidation of aromatic boronic esters**

To a mixture of the aromatic boronic ester (0.2 mmol) dissolved in ethanol (8 mL), was added  $\text{Na}_2\text{CO}_3$  (0.2 mmol). To this mixture 30% w/v  $\text{H}_2\text{O}_2$  (2 mL) was added dropwise. The reaction was stirred at r.t.. Upon completion of reaction, 20 mL  $\text{H}_2\text{O}$  was added, and the product extracted from DCM (3 x 20 mL). The organic layers were combined and dried over  $\text{MgSO}_4$ , then concentrated in vacuo. The product was purified by flash column chromatography (eluting solvent 10 % ethyl acetate in petroleum ether).

### Synthesis of 5-chloro-2-trimethylsilylphenol and 4-chloro-2-trimethylsilylphenol

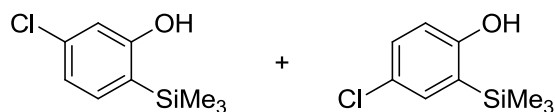

Using General Procedure 3, with **10a,b** (63 mg, 0.20 mmol), the product was isolated as an inseparable mixture of compounds (5:3 ratio) as a clear oil, 30 mg, 75 % yield.

$^1\text{H}$  NMR (400 MHz,  $\text{CDCl}_3$ ):  $\delta$  0.32 (3.4H, s, Si- $\text{CH}_3$ ), 0.33 (5.6H, s, Si- $\text{CH}_3$ ), 4.87 (0.6H, br s, OH), 4.98 (0.4H, br s, OH), 6.63 (0.6H, d,  $J = 8.5$  Hz, Ar- $H$ ), 6.72 (0.4H, d,  $J = 2.0$  Hz, Ar- $H$ ), 6.94 (0.4H, dd,  $J = 2.0, 8.0$  Hz, Ar- $H$ ), 7.19 (0.6H, dd,  $J = 2.5, 8.5$  Hz, Ar- $H$ ), 7.28 – 7.30 (1H, m, Ar- $H$ ).  $^{13}\text{C}$  NMR (100.6 MHz,  $\text{CDCl}_3$ ): -0.7, -0.6, 115.2, 116.3, 121.2, 124.4, 126.1, 128.5, 130.6, 135.2, 136.3, 136.6, 159.1, 161.3. FTIR ( $\text{CH}_2\text{Cl}_2$ , thin film): 3425 (br, s), 2956 (m), 1589 (m), 1479 (m), 1381 (s), 840 (s)  $\text{cm}^{-1}$ . HRMS calculated for  $\text{C}_9\text{H}_{14}^{35}\text{ClOSi}$  ( $\text{M}^+$ ): 200.0424. Found: 200.0428.

### Synthesis of 5-bromo-2-trimethylsilylphenol and 4-bromo-2-trimethylsilylphenol

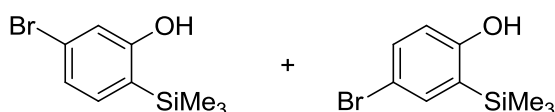

Using General Procedure 3, with **11a,b** (130 mg, 0.37 mmol), the product was isolated as an inseparable mixture of compounds (3:2 ratio) as a clear oil, 67 mg, 75 % yield.

$^1\text{H}$  NMR (250 MHz,  $\text{CDCl}_3$ ):  $\delta$  0.33 (5.4H, s, Si- $\text{CH}_3$ ), 0.34 (3.6H, s, Si- $\text{CH}_3$ ), 5.01 (0.6H, br s, OH), 5.13 (0.4H, br s, OH), 6.59 (0.4H, d,  $J = 8.5$  Hz, Ar- $H$ ), 6.88 (0.6H, d,  $J = 1.5$  Hz, Ar- $H$ ), 7.10 (0.6H, dd,  $J = 1.5, 8.0$  Hz, Ar- $H$ ), 7.24 (0.6H, d,  $J = 8.0$  Hz, Ar- $H$ ), 7.34 (0.4H, dd,  $J = 2.0, 8.5$  Hz, Ar- $H$ ), 7.45 (0.4H, d,  $J = 2.0$  Hz, Ar- $H$ ).  $^{13}\text{C}$  NMR (100.6 MHz,  $\text{CDCl}_3$ ): -0.7, -0.6, 113.8, 116.9, 118.1, 124.1, 124.4, 125.0, 129.3, 133.6, 136.9, 138.1, 160.0, 161.4. FTIR ( $\text{CH}_2\text{Cl}_2$ , thin film): 3347 (br, s), 2956 (m), 2232 (s), 1588 (s), 1401 (s), 842 (s)  $\text{cm}^{-1}$ . HRMS calculated for  $\text{C}_9\text{H}_{13}^{79}\text{BrOSi}$  ( $\text{EI}^+$ ): 243.9919. Found: 243.9925.

### Synthesis of 3,5-dichloro-2-trimethylsilylphenol and 2,4-dichloro-6-trimethylsilylphenol

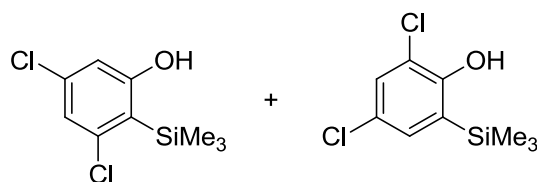

Using General Procedure 3, with **12a,b** (123 mg, 0.36 mmol), the product was isolated as an inseparable mixture of compounds (1:1 ratio) as a clear oil, 56 mg, 95 % yield.

<sup>1</sup>H NMR (250 MHz, CDCl<sub>3</sub>): δ 0.33 (9H, s, Si-CH<sub>3</sub>), 0.46 (9H, s, Si-CH<sub>3</sub>), 4.70 – 6.23 (2H, br, OH), 6.65 (1H, d, *J* = 2.0 Hz, Ar-H), 6.96 (1H, d, *J* = 2.0 Hz, Ar-H), 7.20 (1H, d, *J* = 2.5 Hz, Ar-H), 7.34 (1H, d, *J* = 2.5 Hz, Ar-H). <sup>13</sup>C NMR (100.6 MHz, CDCl<sub>3</sub>): -1.3, 1.7, 114.2, 119.9, 121.9, 122.4, 125.4, 129.0, 129.1, 133.4, 136.0, 142.1, 153.9, 161.8. FTIR (CH<sub>2</sub>Cl<sub>2</sub>, thin film): 3415 (br, s), 2959 (s), 1698 (s), 1577 (s), 1378 (s), 847 (s) cm<sup>-1</sup>. HRMS calculated for C<sub>9</sub>H<sub>12</sub><sup>35</sup>Cl<sub>2</sub>OSi (EI<sup>+</sup>): 234.0034. Found: 234.0024.

### Synthesis of 3-hydroxy-4-trimethylsilylbenzoic acid methyl ester and 4-hydroxy-3-trimethylsilylbenzoic acid methyl ester

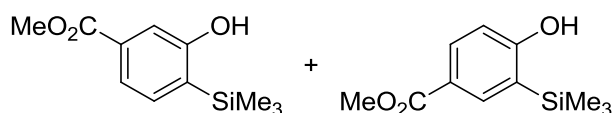

Using General Procedure 3, with **13a,b** (385 mg, 1.15 mmol), the product was isolated as an inseparable mixture of compounds (3:2 ratio) as a clear oil, 180 mg, 70 % yield.

<sup>1</sup>H NMR (250 MHz, CDCl<sub>3</sub>): δ 0.35 (9H, s, Si-CH<sub>3</sub>), 3.92 (1.2H, s, CH<sub>3</sub>), 3.94 (1.8H, s, CH<sub>3</sub>), 5.60 (0.6H, br s, OH), 5.77 (0.4H, br s, OH), 6.74 (0.4H, d, *J* = 8.5 Hz, Ar-H), 7.45 (1.2H, m, Ar-H), 7.59 (0.6H, dd, *J* = 1.5, 7.5 Hz, Ar-H), 7.96 (0.4H, dd, *J* = 2.0, 8.5 Hz, Ar-H), 8.09 (0.4H, d, *J* = 2.0 Hz, Ar-H). <sup>13</sup>C NMR (100.6 MHz, CDCl<sub>3</sub>): δ -1.1, -1.2, 51.9, 52.3, 114.3, 114.9, 121.3, 122.3, 125.7, 132.1 (x2), 132.9, 135.4, 137.6, 160.6, 164.5, 167.3, 167.4. FTIR (CH<sub>2</sub>Cl<sub>2</sub>, thin film): 3375 (br, s), 2957 (m), 1687 (s), 1593 (m), 1395 (s), 1266 (s), 837 (s) cm<sup>-1</sup>. HRMS calculated for C<sub>11</sub>H<sub>16</sub>O<sub>3</sub>Si (MH<sup>+</sup>): 225.0947. Found: 225.0948.



### Synthesis of 3-bromo-5-hydroxy-4-trimethylsilanyl-benzoic acid methyl ester and 3-bromo-4-hydroxy-5-trimethylsilanyl-benzoic acid methyl ester

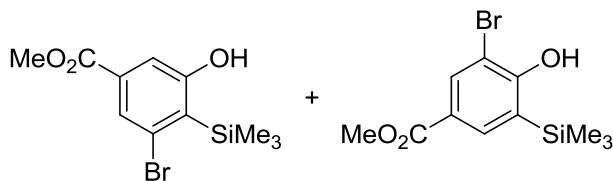

Using General Procedure 3, with **14a,b** (201 mg, 0.49 mmol), the product was isolated as an inseparable mixture of compounds (3:2 ratio) as a colourless solid, 119 mg, 81 % yield, m.pt. = 97 – 99 °C.

<sup>1</sup>H NMR (250 MHz, CDCl<sub>3</sub>): δ 0.35 (5.4H, s, Si-CH<sub>3</sub>), 0.50 (3.6H, s, Si-CH<sub>3</sub>), 3.91 (1.2H, s, CH<sub>3</sub>), 3.92 (1.8H, s, CH<sub>3</sub>), 6.22 (0.6H, br s, OH), 6.85 (0.4H, br s, OH), 7.45 (0.4H, d, *J* = 1.5 Hz, Ar-*H*), 7.74 (0.4H, d, *J* = 1.5 Hz, Ar-*H*). 8.00 (0.6H, d, *J* = 2.0 Hz, Ar-*H*), 8.19 (0.6H, d, *J* = 2.0 Hz, Ar-*H*). <sup>13</sup>C NMR (100.6 MHz, CDCl<sub>3</sub>): δ -0.9, -0.3, 52.6, 52.8, 110.7, 123.2, 124.1, 127.4, 127.5, 131.8, 133.2, 133.8, 135.2, 136.4, 136.8, 140.7, 166.3, 166.6. FTIR (CH<sub>2</sub>Cl<sub>2</sub>, thin film): 3315 (br, s), 2951 (m), 1703 (s), 1687 (s), 1258 (s), 1247 (s), 843 (s) cm<sup>-1</sup>. HRMS calculated for C<sub>11</sub>H<sub>15</sub><sup>79</sup>BrO<sub>3</sub>Si (MH<sup>+</sup>): 303.0052. Found: 303.0057.

### Synthesis of 3-hydroxy-4-trimethylsilanyl-benzonitrile **36a** and 4-hydroxy-3-trimethylsilanyl-benzonitrile **36b**

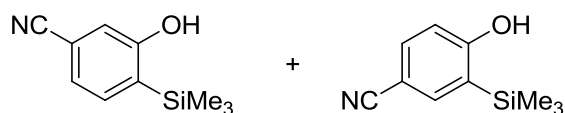

Using General Procedure 3, with **15a,b** (49 mg, 0.16 mmol), the product was isolated as an inseparable mixture of compounds (1:1 ratio) as a colourless solid, 11 mg, 71 % yield, m.pt. = 82 – 84 °C.

<sup>1</sup>H NMR (250 MHz, CDCl<sub>3</sub>): δ 0.34 (18H, s, Si-CH<sub>3</sub>), 5.34 (1H, br s, OH), 5.75 (1H, br s, OH), 7.00 (1H, d, *J* = 1.0 Hz, Ar-*H*), 7.24 (1H, dd, *J* = 1.0, 7.5 Hz, Ar-*H*), 7.46 (1H, d, *J* = 7.5 Hz, Ar-*H*), 7.48 (1H, dd, *J* = 2.0, 8.0 Hz, Ar-*H*), 7.74 (1H, d, *J* = 2.0 Hz, Ar-*H*), 7.80 (1H, d, *J* = 8.0 Hz, Ar-*H*). <sup>13</sup>C NMR (100.6 MHz, CDCl<sub>3</sub>): δ -1.3 (x2), 103.6, 113.3, 115.1, 116.9, 118.8, 119.7, 123.9, 127.9, 133.3, 134.9, 136.1, 139.9, 160.6, 164.1. FTIR (CH<sub>2</sub>Cl<sub>2</sub>, thin film): 3347 (br, s), 2956 (m), 2232 (s), 1588 (s), 1401 (s), 842 (s) cm<sup>-1</sup>. HRMS calculated for C<sub>10</sub>H<sub>13</sub>NOSi (MH<sup>+</sup>): 192.0845. Found: 192.0846.

### Synthesis of 3-bromo-5-hydroxy-4-trimethylsilyl-benzonitrile and 3-bromo-4-hydroxy-5-trimethylsilyl-benzonitrile

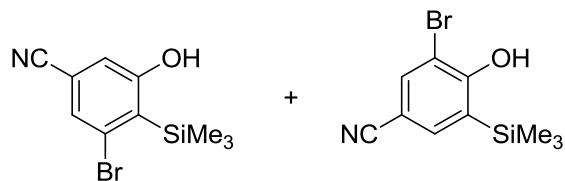

Using General Procedure 3, with **16a,b** (43 mg, 0.14 mmol), the product was isolated as an inseparable mixture of compounds (3:2 ratio) as a clear oil, 26 mg, 84 % yield.

<sup>1</sup>H NMR (250 MHz, CDCl<sub>3</sub>): δ 0.34 (5.4H, s, Si-CH<sub>3</sub>), 0.50 (3.6H, s, Si-CH<sub>3</sub>), 6.21 (0.4H, br s, OH), 6.24 (0.6H, br s, OH), 6.96 (0.6H, d, *J* = 1.5 Hz, Ar-*H*), 7.40 (0.6H, d, *J* = 1.5 Hz, Ar-*H*), 7.59 (0.4H, d, *J* = 2.0 Hz, Ar-*H*), 7.80 (0.4H, d, *J* = 2.0 Hz, Ar-*H*). <sup>13</sup>C NMR (100.6 MHz, CDCl<sub>3</sub>): -1.1, 2.3, 105.7, 110.9, 114.8, 117.2, 117.6, 118.5, 128.9, 129.4, 131.6, 133.4, 136.9, 139.2, 160.1, 162.2. FTIR (CH<sub>2</sub>Cl<sub>2</sub>, thin film): 3354 (br s), 2925 (s), 2232 (m), 1580 (m), 1249 (s), 844 (s) cm<sup>-1</sup>. HRMS calculated for C<sub>10</sub>H<sub>11</sub><sup>79</sup>BrNOSi (M<sup>+</sup>): 267.9793. Found: 267.9793.

### General Procedure 4: The sulfonylation of *o*-trimethylsilyl phenols

A solution of the phenol (1.0 mmol) and <sup>i</sup>Pr<sub>2</sub>NEt (2.0 mmol), in DCM (1 mL) was cooled to 0 °C and stirred for 10 mins. To this mixture Tf<sub>2</sub>O (1.5 mmol) was added dropwise. The reaction was stirred at 0 °C for a further 10 mins, then left stirring overnight at r.t.. To the reaction was added Et<sub>2</sub>O (approx. 20 mL), then this mixture washed successively with sat. aq. NH<sub>4</sub>Cl, sat. aq. NaHCO<sub>3</sub> and sat. aq. NaCl. The organic layers were then combined, dried with MgSO<sub>4</sub> and concentrated in vacuo. If necessary, products were purified by flash column chromatography (eluting solvent 10 % ethyl acetate in petroleum ether).

### Synthesis of trifluoromethanesulfonic acid 5-chloro-2-trimethylsilyl-phenyl ester **17a** and trifluoromethanesulfonic acid 4-chloro-2-trimethylsilyl-phenyl ester **17b**

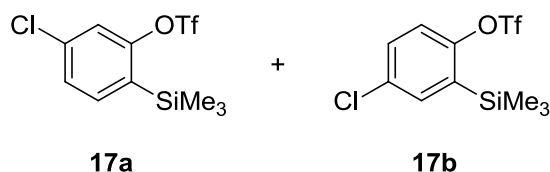

Using General Procedure 4 with the appropriate phenol (30 mg, 0.10 mmol), the product was isolated as an inseparable mixture of compounds **17a** and **17b** (5:3 ratio) as a brown oil, 48 mg, 94 % yield.

$^1\text{H}$  NMR (250 MHz,  $\text{CDCl}_3$ ): **17a/b**:  $\delta$  0.37 (3.4H, s,  $\text{CH}_3$ ), 0.39 (5.6H, s,  $\text{CH}_3$ ), 7.24 – 7.52 (3H, m, Ar-H).  $^{13}\text{C}$  NMR (100.6 MHz,  $\text{CDCl}_3$ ): **17a/b**:  $\delta$  -1.0, -0.9, 118.4 (x2) (q,  $J = 320$  Hz,  $\text{CF}_3$ ), 120.2, 121.0, 127.9, 131.0, 131.1, 133.5, 135.3, 135.9, 136.6, 136.9, 153.1, 154.7. FTIR ( $\text{CH}_2\text{Cl}_2$ , thin film): 2928 (m), 1587 (s), 1424 (s), 1214 (s), 1140 (s), 845 (s)  $\text{cm}^{-1}$ . HRMS calculated for  $\text{C}_{10}\text{H}_{12}^{35}\text{ClF}_3\text{O}_3\text{SSi}$  (AP $^+$ ): 332.9992. Found: 332.9995.

### Synthesis of trifluoromethanesulfonic acid 5-bromo-2-trimethylsilyl-phenyl ester **18a** and trifluoromethanesulfonic acid 4-bromo-2-trimethylsilyl-phenyl ester **18b**

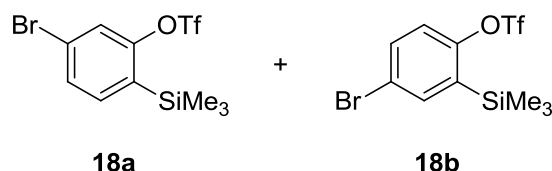

Using General Procedure 4 with the appropriate phenol (67 mg, 0.27 mmol), the product was isolated as an inseparable mixture of compounds **18a** and **18b** (3:2 ratio) as a brown oil, 114 mg, 100 % yield.

$^1\text{H}$  NMR (250 MHz,  $\text{CDCl}_3$ ): **18a/b**:  $\delta$  0.38 (5.4H, s,  $\text{CH}_3$ ), 0.40 (3.6H, s,  $\text{CH}_3$ ), 7.24 (0.4H, d,  $J = 9.0$  Hz, Ar-H), 7.43 (0.6H, m, Ar-H), 7.51 (1.2H, m, Ar-H), 7.57 (0.4H, dd,  $J = 2.5, 9.0$  Hz, Ar-H), 7.63 (0.4H, d,  $J = 2.5$  Hz, Ar-H).  $^{13}\text{C}$  NMR (100.6 MHz,  $\text{CDCl}_3$ ): **18a/b**:  $\delta$  -0.6, -0.5, 118.8 (x2) (q,  $J = 320$  Hz,  $\text{CF}_3$ ), 121.8, 122.1, 123.4, 124.6, 131.2, 132.0, 134.4, 136.2, 137.6, 139.2, 154.1, 155.1. FTIR ( $\text{CH}_2\text{Cl}_2$ , thin film): 2960 (m), 1581 (s), 1424 (s), 1215 (s), 1141 (s), 845 (s)  $\text{cm}^{-1}$ . HRMS calculated for  $\text{C}_{10}\text{H}_{12}^{79}\text{BrF}_3\text{O}_3\text{SSi}$  (EI $^+$ ): 375.9412. Found: 375.9412.

### Synthesis of trifluoromethanesulfonic acid 3,5-dichloro-2-trimethylsilyl-phenyl ester **19a** and trifluoromethanesulfonic acid 2,4-dichloro-6-trimethylsilyl-phenyl ester **19b**

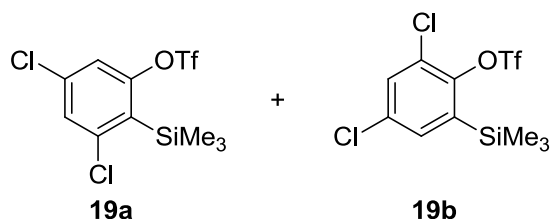

Using General Procedure 4 with the appropriate phenol (21 mg, 0.09 mmol), the product was isolated as an inseparable mixture of compounds **19a** and **19b** (1:1 ratio) as a brown oil, 18 mg, 53 % yield.

<sup>1</sup>H NMR (250 MHz, CDCl<sub>3</sub>): **19 a or b**: δ 0.50 (9H, s, CH<sub>3</sub>), 7.29 (1H, d, *J* = 2.0 Hz, Ar-*H*), 7.41 (1H, d, *J* = 2.0 Hz, Ar-*H*). **19 a or b**: δ 0.43 (9H, s, CH<sub>3</sub>), 7.40 (1H, d, *J* = 2.5 Hz, Ar-*H*), 7.52 (1H, d, *J* = 2.5 Hz, Ar-*H*). <sup>13</sup>C NMR (100.6 MHz, CDCl<sub>3</sub>): **19a/b**: δ 0.2, 1.7, 118.9 (q, *J* = 321 Hz, CF<sub>3</sub>), 119.0 (q, *J* = 321 Hz, CF<sub>3</sub>), 120.0, 128.9, 130.2, 130.9, 132.4, 134.8, 134.9, 136.8, 139.8, 143.3, 147.0, 154.6. FTIR (CH<sub>2</sub>Cl<sub>2</sub>, thin film): 2927 (s), 1732 (w), 1607 (m), 1416 (s), 1211 (s), 820 (s) cm<sup>-1</sup>. HRMS calculated for C<sub>10</sub>H<sub>11</sub>Cl<sub>2</sub>F<sub>3</sub>O<sub>3</sub>SSi (EI<sup>+</sup>): 365.9527. Found: 365.9541.

### Synthesis of 3-trifluoromethanesulfonyloxy-4-trimethylsilyl-benzoic acid methyl ester **20a** and 4-trifluoromethanesulfonyloxy-3-trimethylsilyl-benzoic acid methyl ester **20b**

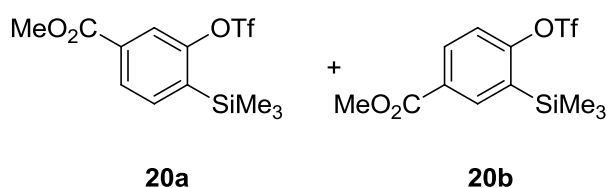

Using General Procedure 4 with the appropriate phenol (120 mg, 0.54 mmol), the product was isolated as an inseparable mixture of compounds **20a** and **20b** (3:2 ratio) as a clear oil, 187 mg, 98 % yield.

<sup>1</sup>H NMR (250 MHz, CDCl<sub>3</sub>): **20a/b**: δ 0.41 (9H, s, CH<sub>3</sub>), 3.95 (1.2H, s, CH<sub>3</sub>), 3.96 (1.8H, s, CH<sub>3</sub>), 7.44 (0.4H, d, *J* = 9.0 Hz, Ar-*H*), 7.64 (0.6H, d, *J* = 7.5 Hz, Ar-*H*), 7.97 (0.6H, m, Ar-*H*), 8.01 (0.6H, dd, *J* = 1.5, 7.5 Hz, Ar-*H*), 8.12 (0.4H, dd, *J* = 2.0, 9.0 Hz, Ar-*H*), 8.22 (0.4H, d, *J* = 2.0 Hz, Ar-*H*). <sup>13</sup>C NMR (100.6 MHz, CDCl<sub>3</sub>): **20a/b**: δ -0.6 (x2), 52.9, 53.1, 118.9 (x2) (q, *J*

= 320 Hz,  $\text{CF}_3$ ), 119.7, 120.8, 128.6, 129.6, 133.2, 133.5, 133.7, 136.8, 138.2, 139.1, 155.2, 158.3, 165.8, 166.3. FTIR ( $\text{CH}_2\text{Cl}_2$ , thin film): 2958 (m), 1732 (s), 1602 (w), 1424 (s), 1214 (s), 842 (s)  $\text{cm}^{-1}$ . HRMS calculated for  $\text{C}_{12}\text{H}_{15}\text{F}_3\text{O}_5\text{SSi}$  ( $\text{ES}^+$ ): 357.0440. Found: 357.0432.

### Synthesis of 3-bromo-5-trifluoromethanesulfonyloxy-4-trimethylsilyl-benzoic acid methyl ester **21a** and 3-bromo-4-trifluoromethanesulfonyloxy-5-trimethylsilyl-benzoic acid methyl ester **21b**

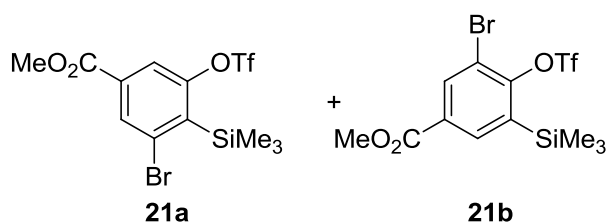

Using General Procedure 4 with the appropriate phenol (121 mg, 0.40 mmol), the product was isolated as an inseparable mixture of compounds **21a** and **21b** (3:2 ratio) as a clear oil, 132 mg, 76 % yield.

$^1\text{H}$  NMR (250 MHz,  $\text{CDCl}_3$ ): **21a/b**:  $\delta$  0.46 (5.4H, s,  $\text{CH}_3$ ), 0.55 (3.6H, s,  $\text{CH}_3$ ), 3.95 – 3.99 (3H, br,  $\text{CH}_3$ ), 7.90 (0.4H, d,  $J = 1.5$  Hz, Ar- $H$ ), 8.18 (0.6H, d,  $J = 2.0$  Hz, Ar- $H$ ), 8.23 (0.4H, d,  $J = 1.5$  Hz, Ar- $H$ ), 8.34 (0.6H, d,  $J = 2.0$  Hz, Ar- $H$ ).  $^{13}\text{C}$  NMR (100.6 MHz,  $\text{CDCl}_3$ ): **21a/b**:  $\delta$  0.0, 1.5, 52.7, 52.9, 116.8, 118.5 (q,  $J = 321$  Hz,  $\text{CF}_3$ ), 118.6 (q,  $J = 321$  Hz,  $\text{CF}_3$ ), 120.3, 130.8, 131.4, 133.4, 134.0, 136.8, 136.9, 138.3, 139.8, 151.8, 154.2, 164.1, 164.7. FTIR ( $\text{CH}_2\text{Cl}_2$ , thin film): 2960 (m), 1732 (s), 1428 (s), 1214 (s), 844 (s)  $\text{cm}^{-1}$ . HRMS calculated for  $\text{C}_{12}\text{H}_{14}^{79}\text{BrF}_3\text{O}_5\text{SSi}$  ( $\text{AP}^+$ ): 434.9545. Found: 434.9541.

### Synthesis of trifluoromethanesulfonic acid 5-cyano-2-trimethylsilyl-phenyl ester **22a** and trifluoromethanesulfonic acid 4-cyano-2-trimethylsilyl-phenyl ester **22b**

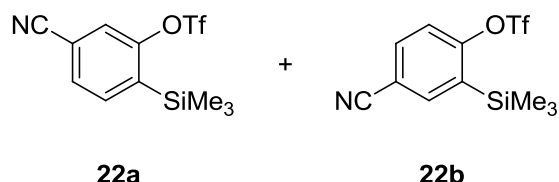

Using General Procedure 4 with the appropriate phenol (200 mg, 1.05 mmol), the product was isolated as an inseparable mixture of compounds **22a** and **22b** (1:1 ratio) as a brown oil, 375 mg, 100 % yield.

$^1\text{H}$  NMR (250 MHz,  $\text{CDCl}_3$ ): **22a/b**:  $\delta$  0.41 (18H, s,  $\text{CH}_3$ ), 7.50 (1H, d,  $J = 8.5$  Hz, Ar- $H$ ), 7.65 (3H, m, Ar- $H$ ), 7.77 (1H, dd,  $J = 2.0, 8.5$  Hz, Ar- $H$ ), 7.84 (1H, d,  $J = 2.0$  Hz, Ar- $H$ ).  $^{13}\text{C}$  NMR (100.6 MHz,  $\text{CDCl}_3$ ): **22a/b**:  $\delta$  -0.72, -0.68, 114.8 (x2) (q,  $J = 478$  Hz,  $\text{CF}_3$ ), 115.3, 117.5, 118.1, 120.4, 120.6, 123.1, 131.1, 135.4, 135.5, 137.6, 140.3, 140.7, 154.7, 157.5. FTIR ( $\text{CH}_2\text{Cl}_2$ , thin film): 2924 (s), 2236 (s), 1426 (s), 1216 (s), 846 (s)  $\text{cm}^{-1}$ . HRMS calculated for  $\text{C}_{11}\text{H}_{12}\text{F}_3\text{NO}_3\text{SSi}$  ( $\text{AP}^+$ ): 324.0338. Found: 324.0329.

### Synthesis of trifluoromethanesulfonic acid 3-bromo-5-cyano-2-trimethylsilyl-phenyl ester **23a** and trifluoromethanesulfonic acid 2-bromo-4-cyano-6-trimethylsilyl-phenyl ester **23b**

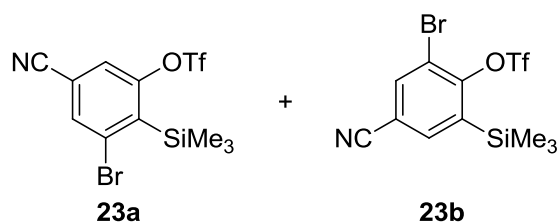

Using General Procedure 4 with the appropriate phenol (248 mg, 0.92 mmol), the product was isolated as an inseparable mixture of compounds **23a** and **23b** (1:1 ratio) as a clear oil, 220 mg, 60 % yield.

$^1\text{H}$  NMR (250 MHz,  $\text{CDCl}_3$ ): **23a/b**:  $\delta$  0.44 (9H, s,  $\text{CH}_3$ ), 0.55 (9H, s,  $\text{CH}_3$ ), 7.58 (1H, d,  $J = 1.5$  Hz, Ar- $H$ ), 7.80 (1H, d,  $J = 1.5$  Hz, Ar- $H$ ), 7.87 (1H, d,  $J = 2.0$  Hz, Ar- $H$ ), 7.98 (1H, d,  $J = 2.0$  Hz, Ar- $H$ ).  $^{13}\text{C}$  NMR (100.6 MHz,  $\text{CDCl}_3$ ): **23a/b**:  $\delta$  0.3, 1.8, 115.8, 116.0, 116.2 (q,  $J = 403$  Hz,  $\text{CF}_3$ ), 116.7, 118.9 (q,  $J = 321$  Hz,  $\text{CF}_3$ ), 123.0, 132.5, 136.3, 139.1, 139.8, 139.1, 139.8, 140.6, 141.7, 152.0, 154.2. FTIR ( $\text{CH}_2\text{Cl}_2$ , thin film): 2926 (m), 2237 (s), 1524 (m), 1414 (s), 1136 (s), 844 (s)  $\text{cm}^{-1}$ . HRMS calculated for  $\text{C}_{11}\text{H}_{11}\text{BrF}_3\text{NO}_3\text{SSi}$  ( $\text{AP}^+$ ): 401.9443. Found: 401.9429.

### General Procedure 5: The cycloaddition of benzyne precursors with benzyl azide

To a mixture of benzyne precursor (0.12 mmol) and benzyl azide (0.10 mmol), dissolved in MeCN (0.12 mL), was added CsF (0.2 mmol). The reaction was then left to stir at r.t. for 18 hrs. The mixture was poured onto sat. aq. NaHCO<sub>3</sub>, and then extracted with DCM (3 x 10 mL). The organic layers were combined, dried over MgSO<sub>4</sub>, and concentrated in vacuo. The crude product was purified via flash column chromatography (eluting solvent 10 % ethyl acetate in petroleum ether).

### Synthesis of 1-benzyl-5-bromo-1H-benzotriazole **24a** and 1-benzyl-6-bromo-1H-benzotriazole **24b**

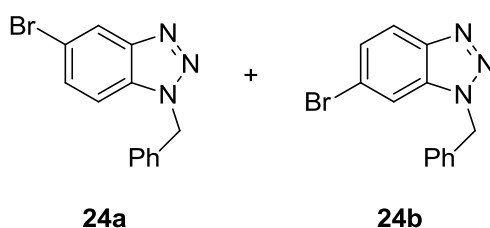

Using General Procedure 5, with benzyne precursor **18a,b** (50 mg, 0.08 mmol), the product was isolated as an inseparable mixture of compounds **24a** and **24b** (2:1 ratio), as a brown solid, 23 mg, 70 % yield, m.pt.= 83 – 85 °C.

<sup>1</sup>H NMR (250 MHz, CDCl<sub>3</sub>): **24a/b**: δ 5.84 (0.7H, s, CH<sub>2</sub>), 5.86 (1.3H, s, CH<sub>2</sub>), 7.25 (0.7H, dd, *J* = 0.5, 9.0 Hz, Ar-*H*), 7.27 – 7.42 (5H, m, Ar-*H*), 7.47 (0.3H, dd, *J* = 1.5, 9.0 Hz, Ar-*H*), 7.51 (0.7H, dd, *J* = 1.5, 9.0 Hz, Ar-*H*), 7.57 (0.3H, dd, *J* = 0.5, 1.5 Hz, Ar-*H*), 7.96 (0.3H, dd, *J* = 0.5, 9.0 Hz, Ar-*H*), 8.25 (0.7H, dd, *J* = 0.5, 1.5 Hz, Ar-*H*). <sup>13</sup>C NMR (100.6 MHz, CDCl<sub>3</sub>): **24a/b**: δ 52.8, 53.0, 111.5, 113.0, 117.7, 121.7, 122.2, 123.1, 126.4, 128.0, 128.2, 129.1, 129.5, 129.6, 131.2, 132.2, 134.3, 134.7, 141.2, 145.6, 148.0, 151.2. FTIR (CH<sub>2</sub>Cl<sub>2</sub>, thin film): 2923 (m), 1605 (m), 1474 (m), 1203 (s), 734 (s) cm<sup>-1</sup>. HRMS calculated for C<sub>13</sub>H<sub>10</sub><sup>79</sup>BrN<sub>3</sub> (ES<sup>+</sup>): 288.0136. Found: 288.0132.

### Synthesis of 1-benzyl-1H-benzotriazole-5-carboxylic acid methyl ester **25a** and 3-benzyl-3H-benzotriazole-5-carboxylic acid methyl ester **25b**

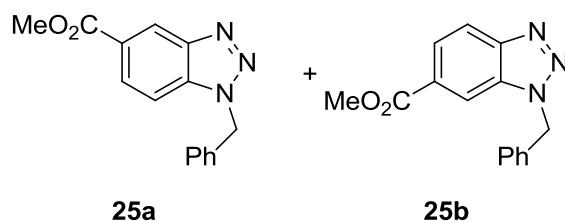

Using General Procedure 5, with benzyne precursor **20a,b** (50 mg, 0.14 mmol), the product was isolated as an inseparable mixture of compounds **25a** and **25b** (1:1 ratio), as a brown solid, 21 mg, 67 % yield, m.pt.= 75 – 78 °C.

<sup>1</sup>H NMR (400 MHz, CDCl<sub>3</sub>): **25a/b**: δ 3.97 (3H, s, CH<sub>3</sub>), 3.99 (3H, s, CH<sub>3</sub>), 5.90 (2H, s, CH<sub>2</sub>), 5.92 (2H, s, CH<sub>2</sub>), 7.30 – 7.43 (11H, m, Ar-H), 8.05 (1H, dd, *J* = 1.5, 8.5 Hz, Ar-H), 8.10 – 8.15 (2H, m, Ar-H), 8.19 (1H, dd, *J* = 1.0, 1.5 Hz, Ar-H), 8.82 (1H, dd, *J* = 1.0, 1.5 Hz, Ar-H).  
<sup>13</sup>C NMR (100.6 MHz, CDCl<sub>3</sub>): **25a/b**: δ 52.9 (x3), 53.0, 110.0, 112.7, 120.4, 123.4, 125.1, 126.8, 128.0 (x2), 128.7, 129.1, 129.6, 129.7, 133.0, 134.7, 134.8, 135.5, 146.5, 148.7, 149.1, 157.0, 166.9 (x2). FTIR (CH<sub>2</sub>Cl<sub>2</sub>, thin film): 2953 (m), 1722 (s), 1436 (s), 1288 (s), 733 (s) cm<sup>-1</sup>. HRMS calculated for C<sub>15</sub>H<sub>13</sub>N<sub>3</sub>O<sub>2</sub> (M<sup>+</sup>): 268.1086. Found: 268.1086.

### Synthesis of 1-benzyl-1H-benzotriazole-5-carbonitrile **26a** and 3-benzyl-3H-benzotriazole-5-carbonitrile **26b**

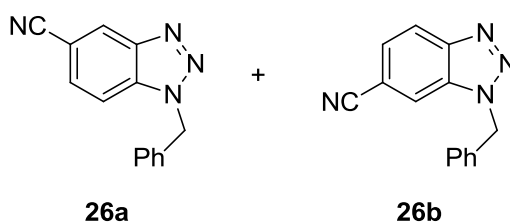

Using General Procedure 5, with benzyne precursor **22a,b** (25 mg, 0.08 mmol), the product was isolated as an inseparable mixture of compounds **26a** and **26b** (2:1 ratio), as a brown solid, 10 mg, 65 % yield, m.pt.= 72 – 74 °C.

<sup>1</sup>H NMR (250 MHz, CDCl<sub>3</sub>): δ 5.91 (1.3H, s, CH<sub>2</sub>), 5.92 (0.7H, s, CH<sub>2</sub>), 7.29 – 7.43 (5H, m, Ar-H), 7.47 (0.7H, dd, *J* = 0.5, 8.5 Hz), 7.57 (0.3H, dd, *J* = 1.5, 8.5 Hz, Ar-H), 7.63 (0.7H, dd, *J* = 1.5, 8.5 Hz, Ar-H), 7.74 (0.3H, s, Ar-H), 8.19 (0.3H, dd, *J* = 0.5, 8.5 Hz, Ar-H), 8.47 (0.7H, s, Ar-H). <sup>13</sup>C NMR (100.6 MHz, CDCl<sub>3</sub>): δ 52.8, 53.0, 107.9 (x2), 111.3 (x2), 115.7 (x2),



118.5, 119.1, 121.6 (x2), 126.3, 126.4, 127.7, 129.0, 129.3, 129.7, 133.8, 134.4, 135.8, 138.0, 141.4, 145.5. FTIR (CH<sub>2</sub>Cl<sub>2</sub>, thin film): 2924 (m), 2232 (m), 1569 (m), 1432 (m), 1205 (m), 720 (m) cm<sup>-1</sup>. HRMS calculated for C<sub>14</sub>H<sub>10</sub>N<sub>4</sub> (MH<sup>+</sup>): 235.0984. Found: 235.0975.

### General Procedure 6: The cycloaddition of benzyne precursors with furans

To a mixture of benzyne precursor (0.10 mmol) and furan (0.50 mmol), dissolved in MeCN (3 mL), was added CsF (0.30 mmol). The reaction was then left to stir at r.t. for 18 hrs. The mixture was then poured onto sat. aq. NaHCO<sub>3</sub>, and then extracted from DCM (3 x 10 mL). The organic layers were combined, dried over MgSO<sub>4</sub>, and concentrated in vacuo. The crude product was purified via flash column chromatography (eluting solvent 10 % ethyl acetate in petroleum ether).

### Synthesis of 11-Oxa-tricyclo[6.2.1.0<sup>2,7</sup>]undeca-2,4,6,9-tetraene-4-carboxylic acid methyl ester **27**

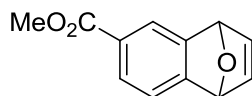

**27**

Using General Procedure 6, with benzyne precursor **20a,b** (25 mg, 0.07 mmol), the product **27** was isolated as a colourless solid, 10 mg, 68 % yield. The compound gave satisfactory spectroscopic data in comparison with the literature.<sup>4</sup>

<sup>1</sup>H NMR (250 MHz, CDCl<sub>3</sub>): δ 3.91 (3H, s, CH<sub>3</sub>), 5.77 (2H, m, CH), 7.05 (2H, m, CH), 7.32 (1H, d, *J* = 7.5 Hz, Ar-*H*), 7.78 (1H, d, *J* = 7.5 Hz, Ar-*H*), 7.89 (1H, s, Ar-*H*). <sup>13</sup>C NMR (100.6 MHz, CDCl<sub>3</sub>): 52.5, 82.6 (x2), 120.4, 121.1, 127.7, 128.5, 142.8, 143.8, 150.0, 154.8, 167.4.

4. Kitamura, T.; Wasai, K.; Todaka, M.; Fujiwara, Y. *Synlett*. **1999**, 6, 731

### Synthesis of 11-Oxa-tricyclo[6.2.1.0<sup>2,7</sup>]undeca-2,4,6,9-tetraene-4-carbonitrile **28**

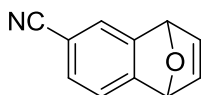

**28**

Using General Procedure 6, with benzyne precursor **22a,b** (50 mg, 0.16 mmol), the product **28** was isolated as a colourless solid, 17 mg, 66 % yield. The compound gave satisfactory spectroscopic data in comparison with the literature <sup>5</sup>

<sup>1</sup>H NMR (250 MHz, CDCl<sub>3</sub>): δ 5.79 (2H, m, CH), 7.06 (2H, m, CH), 7.36 (2H, m, Ar-H), 7.48 (1H, s, Ar-H). <sup>13</sup>C NMR (100.6 MHz, CDCl<sub>3</sub>): δ 82.3, 82.6, 119.6, 121.1, 123.2, 131.4, 135.4, 140.9, 143.0, 143.5, 155.8.

### Synthesis of 1-tert-Butyl-11-oxa-tricyclo[6.2.1.0<sup>2,7</sup>]undeca-2,4,6,9-tetraene-4-carboxylic acid methyl ester **29a** and 8-tert-Butyl-11-oxa-tricyclo[6.2.1.0<sup>2,7</sup>]undeca-2,4,6,9-tetraene-4-carboxylic acid methyl ester **29b**

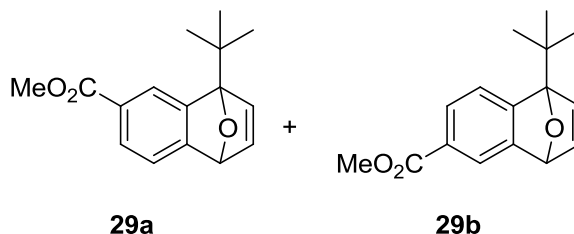

**29a**

**29b**

Using General Procedure 6, with benzyne precursor **20a,b** (30 mg, 0.08 mmol), the product was isolated as an inseparable mixture of compounds **29a** and **29b** (1:1 ratio), 14 mg, 63 % yield.

<sup>1</sup>H NMR (250 MHz, CDCl<sub>3</sub>): **29a/b**: δ 1.29 (9H, s, CH<sub>3</sub>), 1.33 (9H, s, CH<sub>3</sub>), 3.90 (3H, s, CH<sub>3</sub>), 3.91 (3H, s, CH<sub>3</sub>), 5.69 (1H, m, CH), 5.70 (1H, m, CH), 6.93 – 7.08 (4H, m, CH), 7.26 (1H, d, *J* = 7.5 Hz, Ar-H), 7.45 (1H, d, *J* = 7.5 Hz, Ar-H), 7.74 (2H, m, Ar-H), 7.82 (1H, d, *J* = 1.0 Hz, Ar-H), 8.00 (1H, m, Ar-H). <sup>13</sup>C NMR (100.6 MHz, CDCl<sub>3</sub>): **29a/b**: δ 27.0 (x2), 32.9 (x2), 52.5 (x2), 81.6, 81.7, 100.1 (x2), 120.0, 120.6, 121.7, 122.4, 127.0, 127.1, 127.9, 128.0, 142.7,

5. Sapountzis, I.; Lin, W.; Fischer, M.; Knochel, P. *Angew. Chem. Int. Ed.* **2004**, *43*, 4364

143.6, 144.2, 145.2, 150.2, 153.1, 155.3, 158.0, 167.4, 167.5. FTIR (CH<sub>2</sub>Cl<sub>2</sub>, thin film): 2958 (m), 1720 (s), 1435 (s), 1258 (s), 769 (s) cm<sup>-1</sup>. HRMS calculated for C<sub>16</sub>H<sub>18</sub>O<sub>3</sub> (ES<sup>+</sup>): 259.1334. Found: 259.1337.

### Synthesis of 3-benzyl-7-bromo-3H-benzotriazole-5-carbonitrile **30a** and 1-benzyl-7-bromo-1H-benzotriazole-5-carbonitrile **30b**

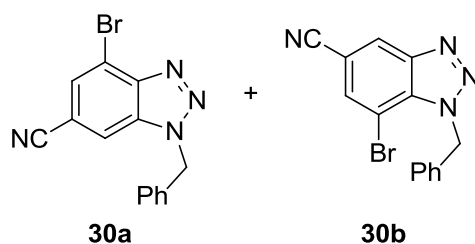

To a mixture of benzyne precursor **23a/b** (50 mg, 0.12 mmol) and benzyl azide (80 mg, 0.60 mmol), dissolved in MeCN (0.6 mL), was added CsF (91 mg, 0.60 mmol). The reaction was then left to stir at r.t. for 18 hrs. The mixture was then poured onto sat. aq. NaHCO<sub>3</sub>, and then extracted from DCM (3 x 10 mL). The organic layers were combined, dried over MgSO<sub>4</sub>, and concentrated in vacuo. The crude product was purified via flash column chromatography (eluting solvent 10 % ethyl acetate in petroleum ether). The product was isolated as an inseparable mixture of compounds **30a** and **30b** (5:1 ratio), as a brown oil, 11 mg, 29 % yield.

<sup>1</sup>H NMR (250 MHz, CDCl<sub>3</sub>): **30a/b**: δ 5.92 (1.7H, s, CH<sub>2</sub>), 6.23 (0.3H, s, CH<sub>2</sub>), 7.08 – 7.46 (5H, m, Ar-H), 7.67 (0.8H, d, *J* = 1.0 Hz, Ar-H), 7.78 (1H, d, *J* = 0.8 Hz, Ar-H), 7.87 (0.2H, d, *J* = 1.0 Hz, Ar-H), 8.45 (0.2H, d, *J* = 1.0 Hz, Ar-H). <sup>13</sup>C NMR (100.6 MHz, CDCl<sub>3</sub>): δ 52.9, 53.6, 112.0, 112.7, 114.5, 114.8 (x2), 115.2, 117.1, 117.3, 117.9, 123.4, 123.9, 125.3, 126.8, 127.1, 127.7, 128.6, 129.0, 129.1, 129.4, 129.5, 133.1, 133.3. FTIR (CH<sub>2</sub>Cl<sub>2</sub>, thin film): 2924 (m), 2232 (m), 1569 (m), 1432 (m), 1205 (m), 720 (m) cm<sup>-1</sup>. HRMS calculated for C<sub>14</sub>H<sub>9</sub><sup>79</sup>BrN<sub>4</sub> (ES<sup>+</sup>): 313.0078. Found: 313.0089.

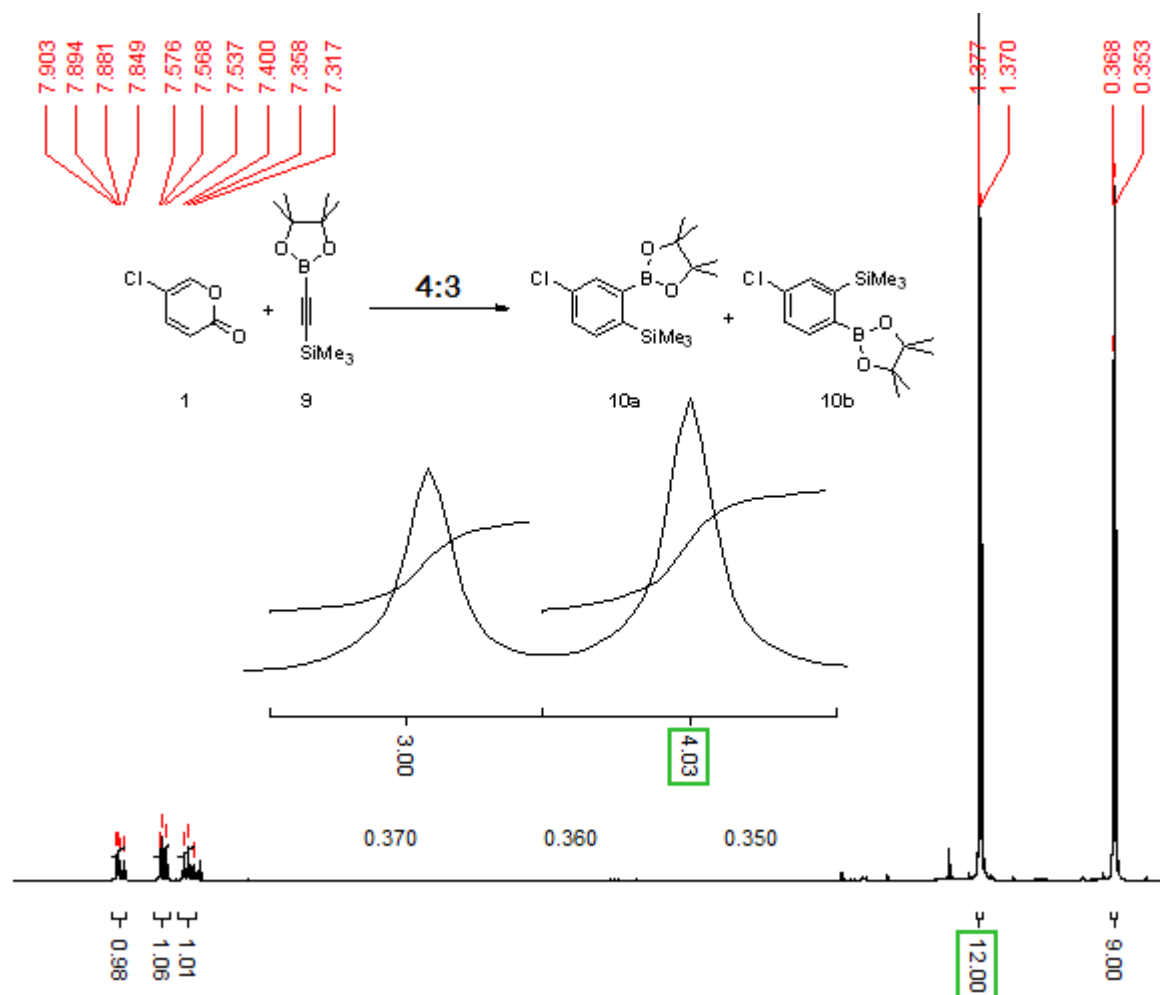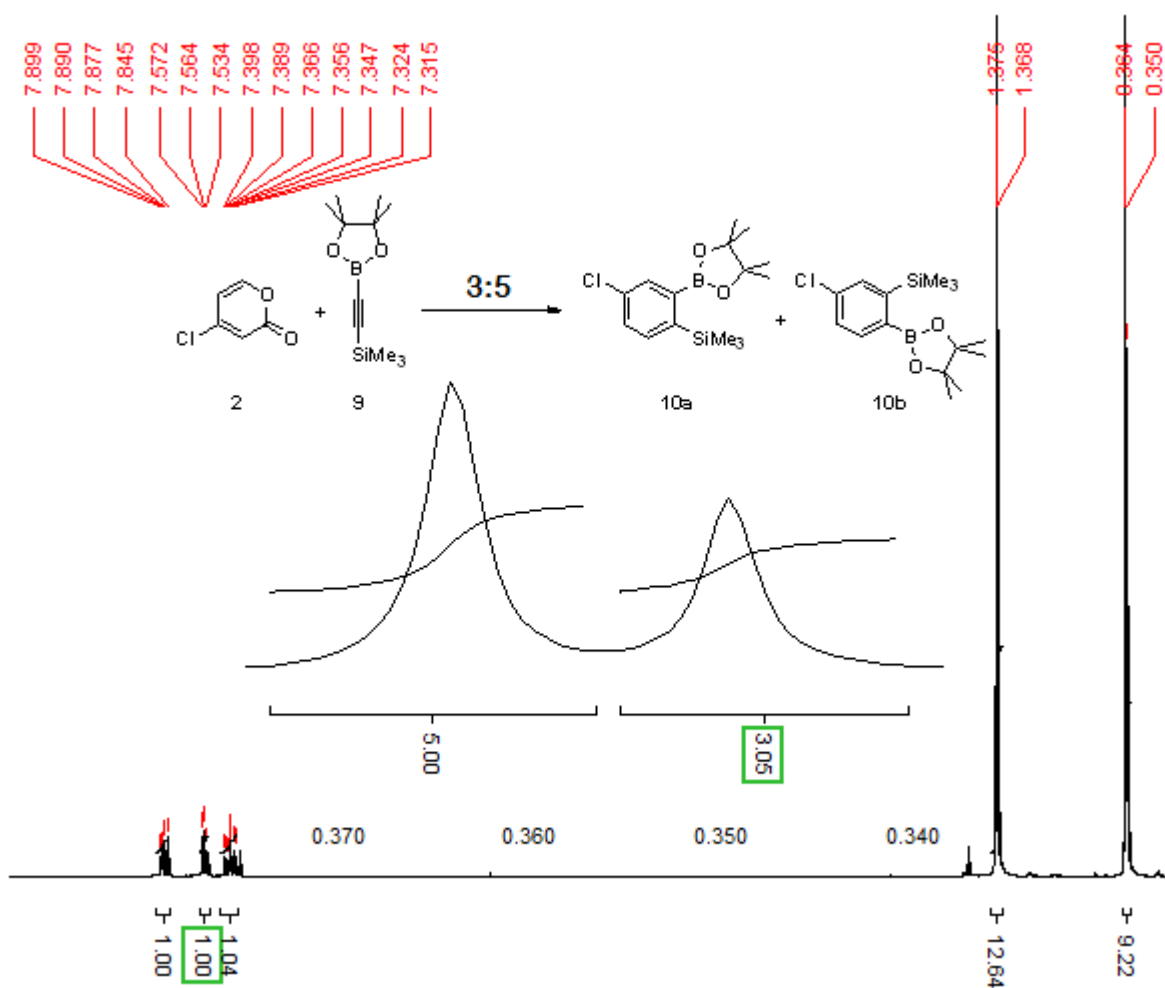

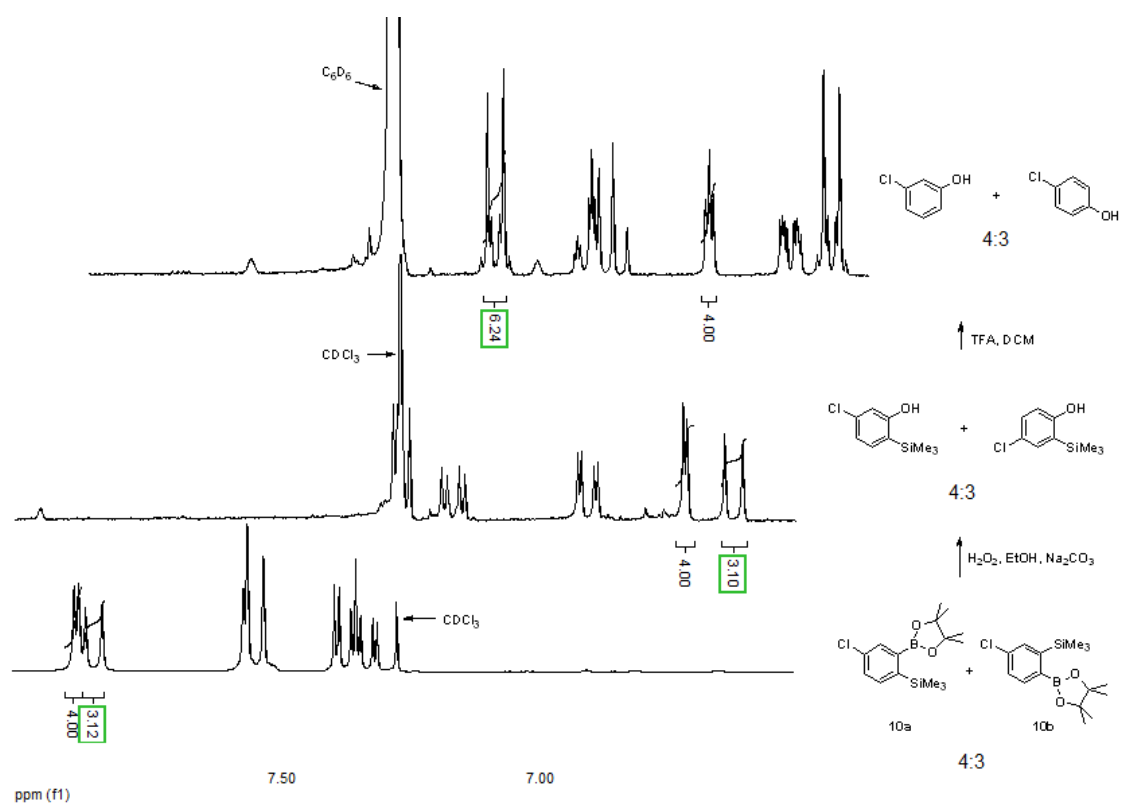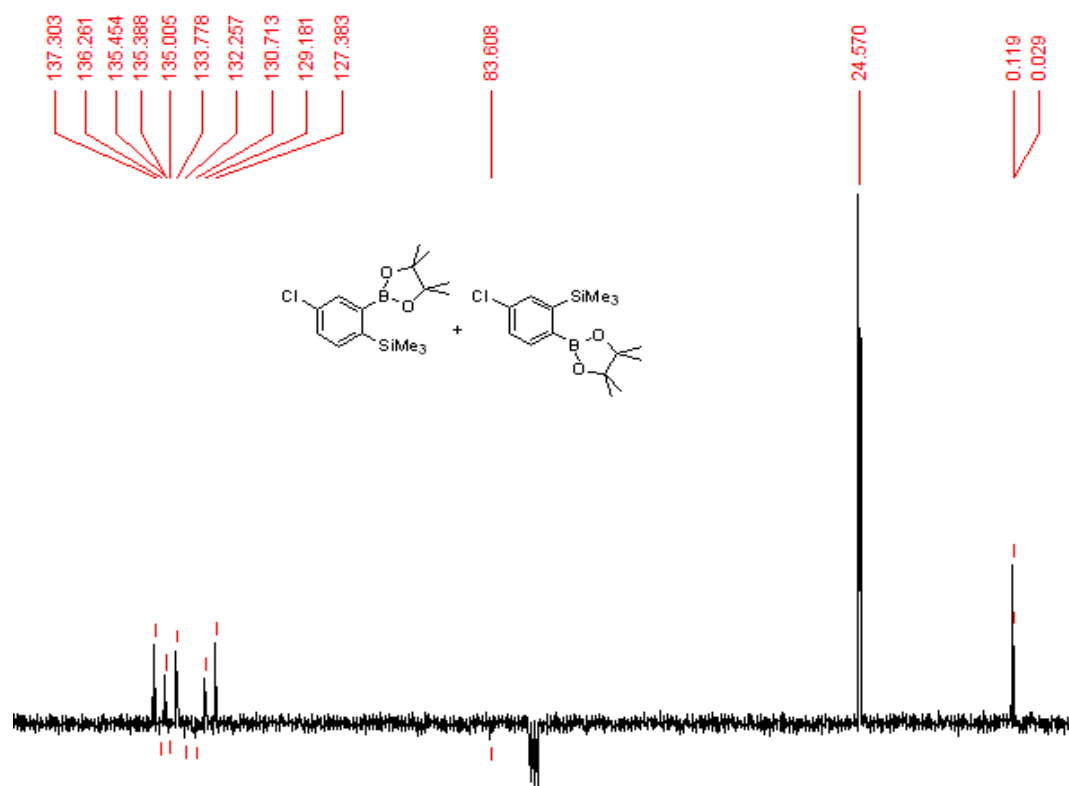

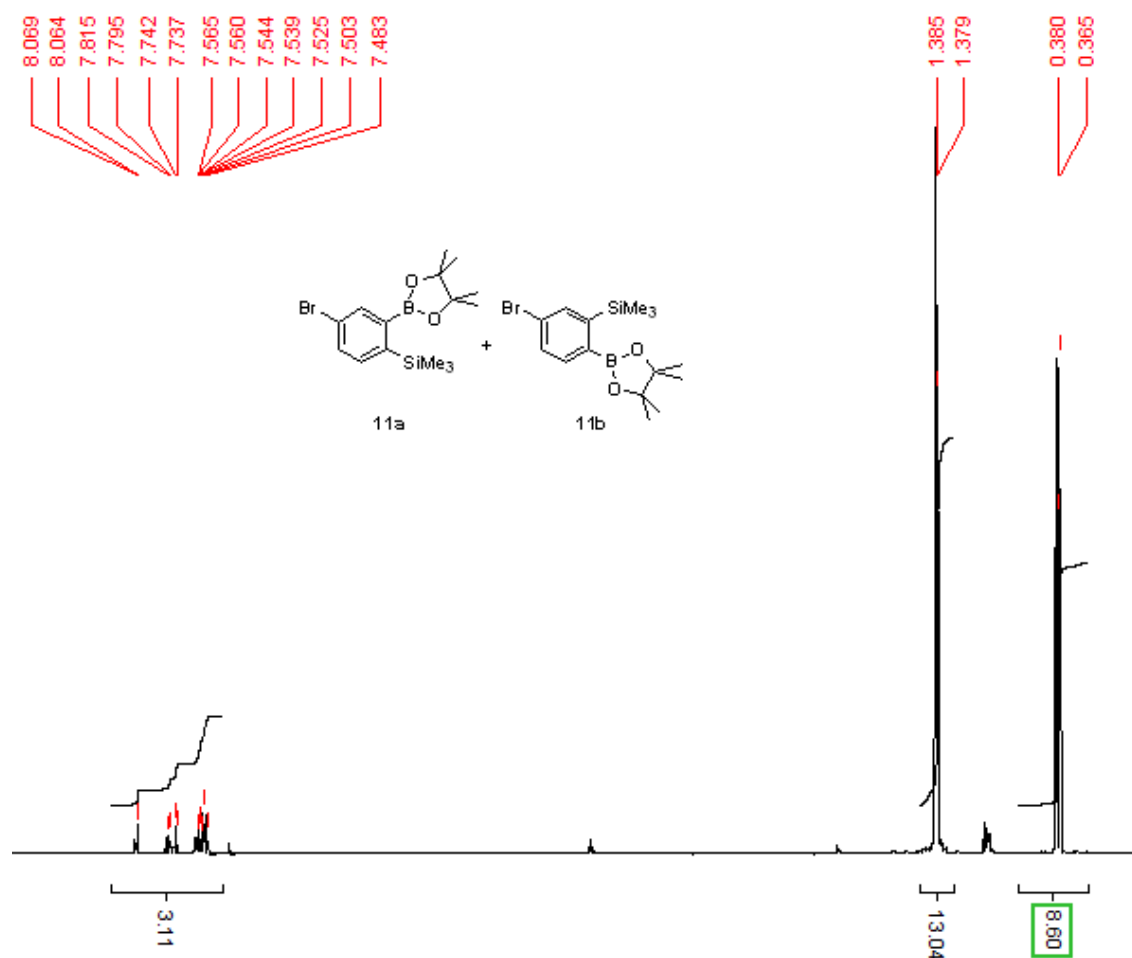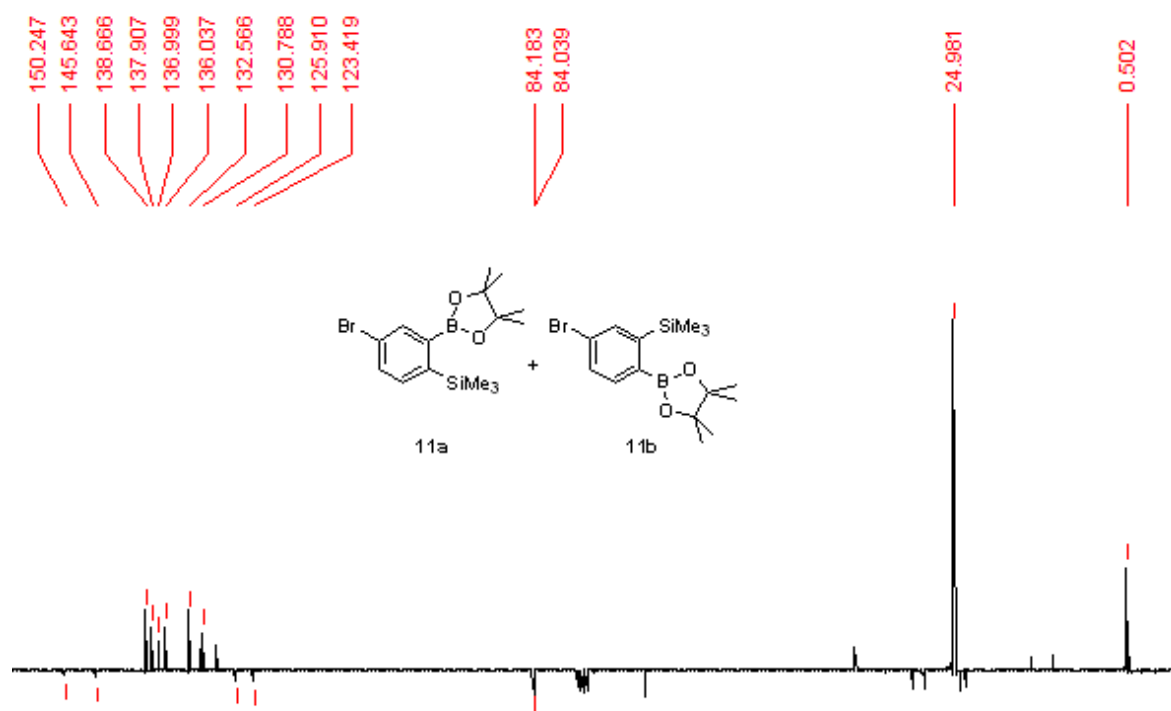

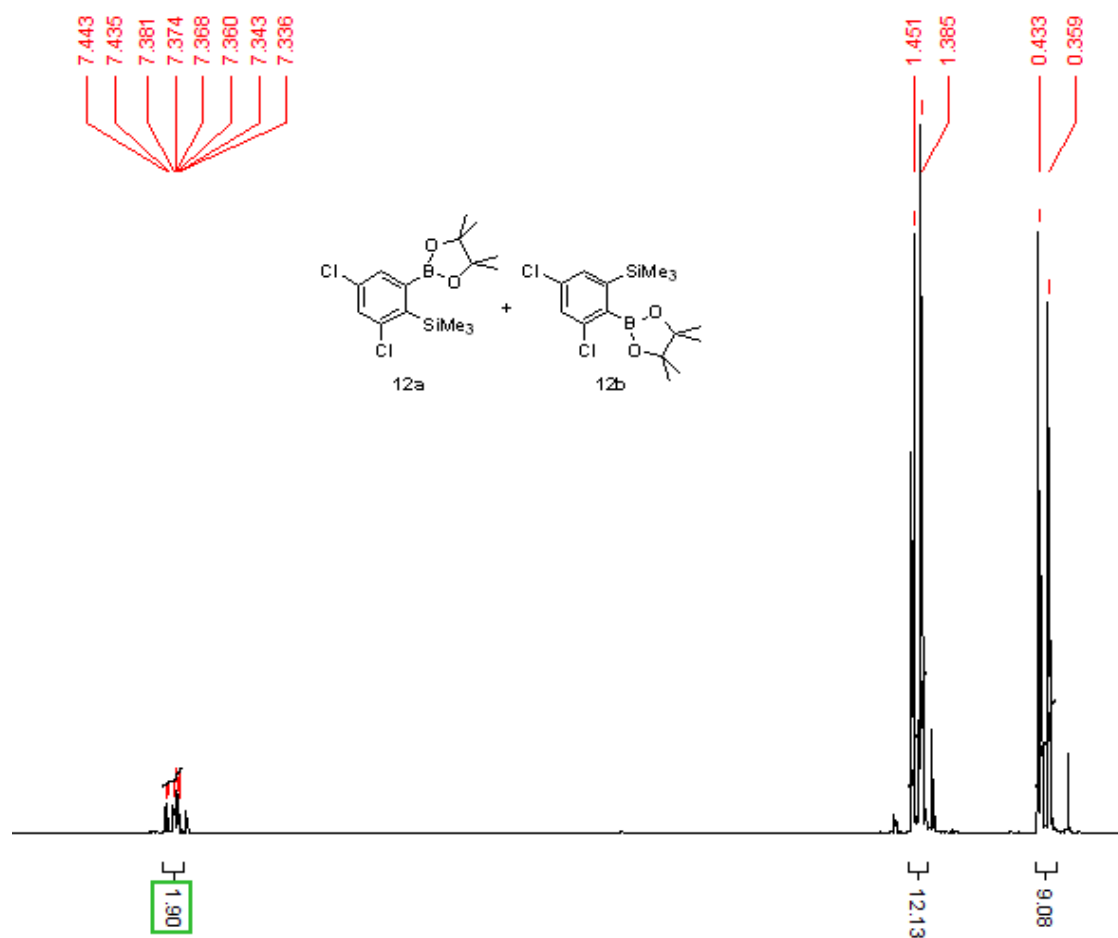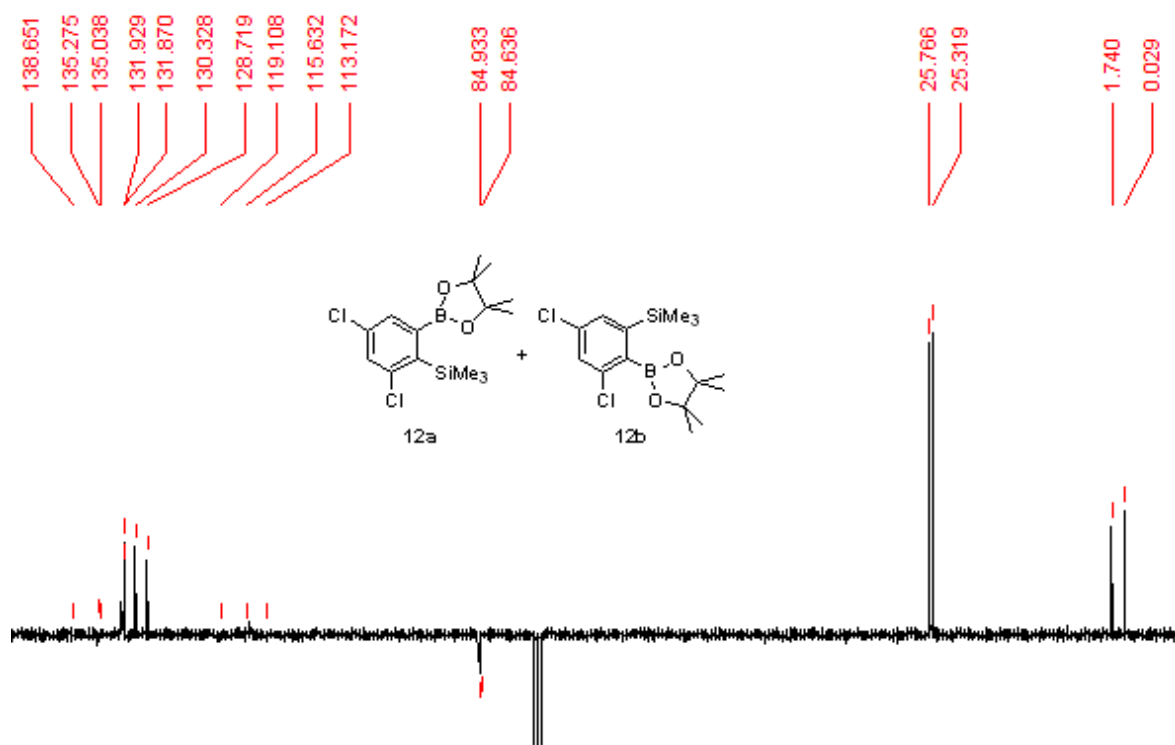

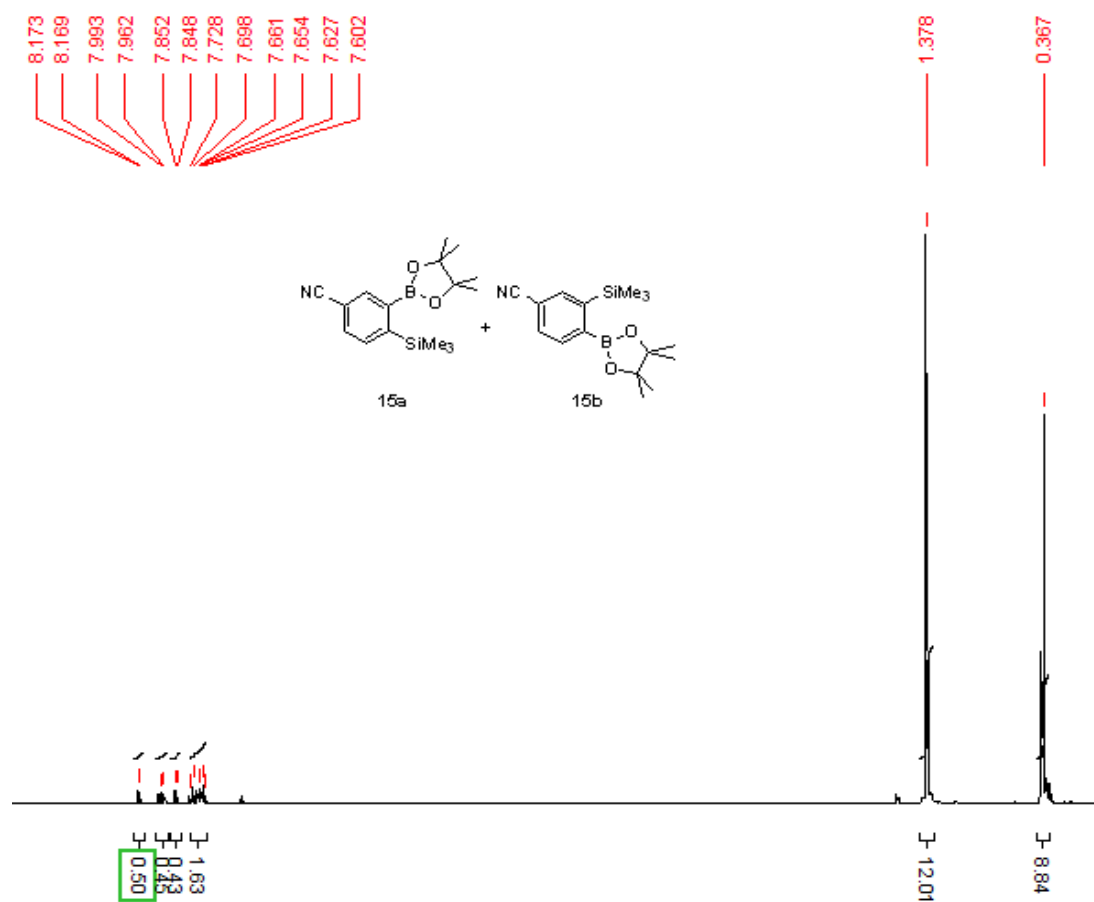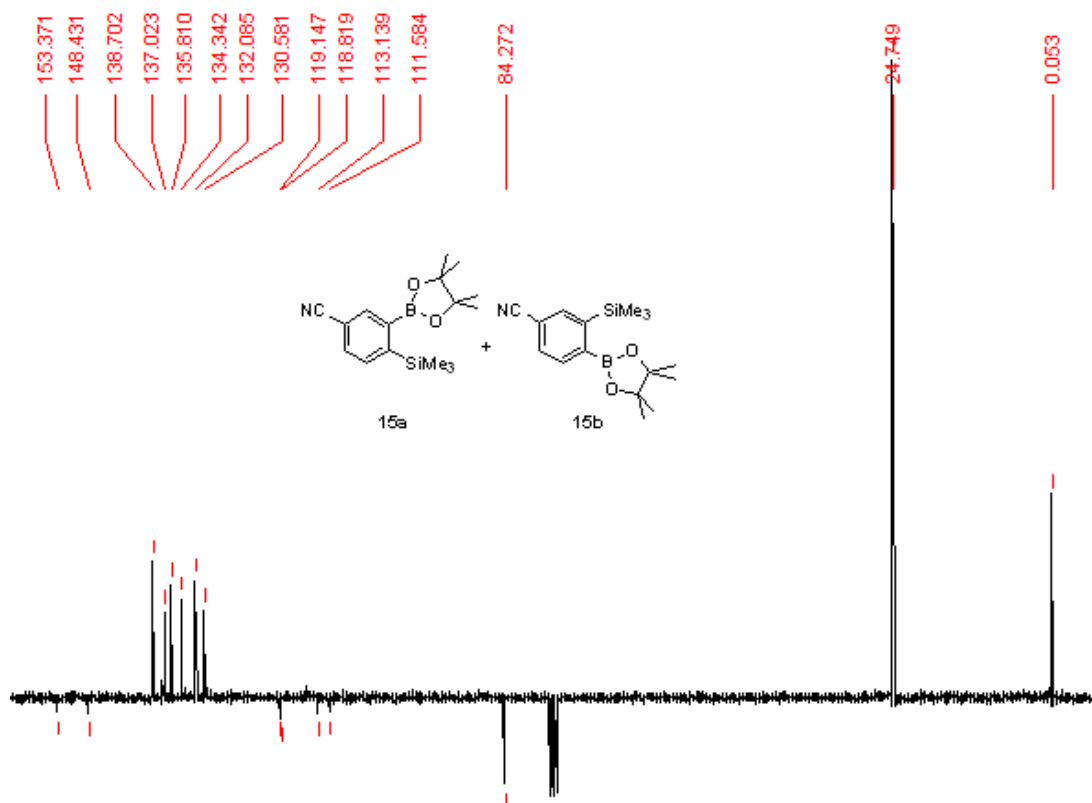



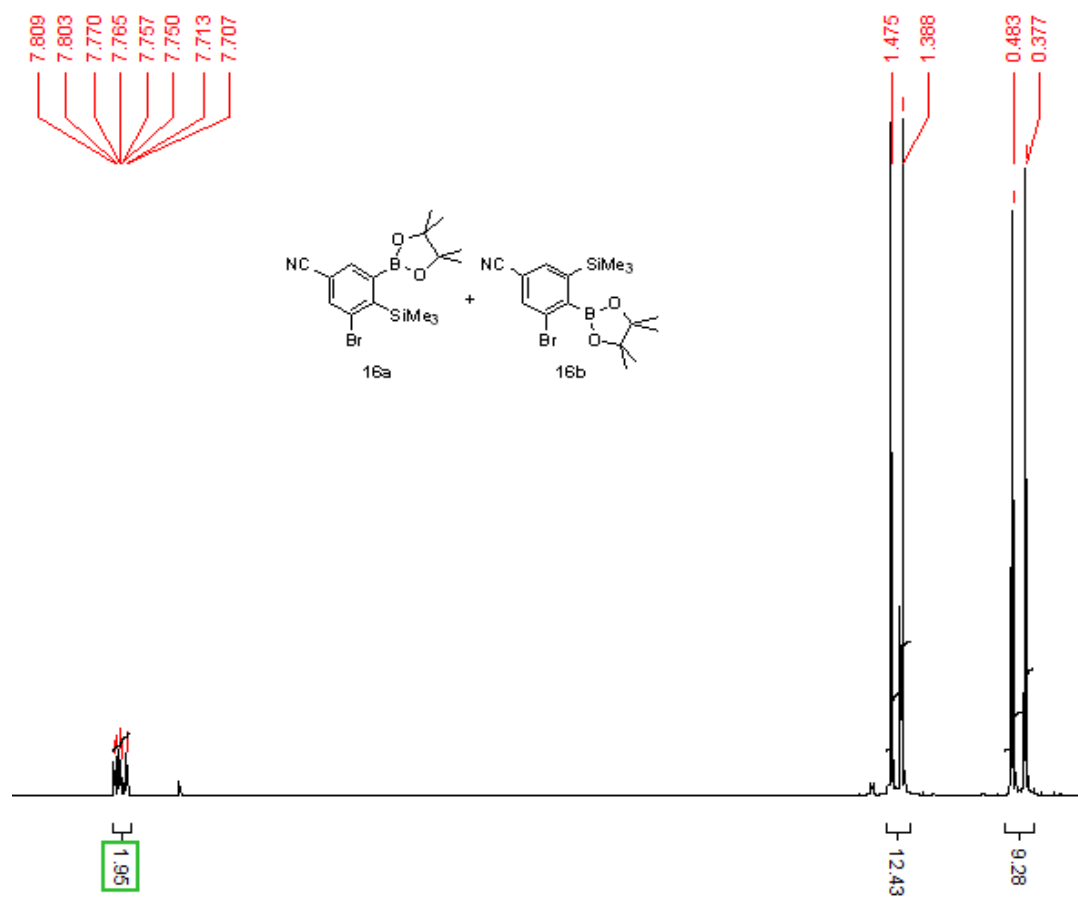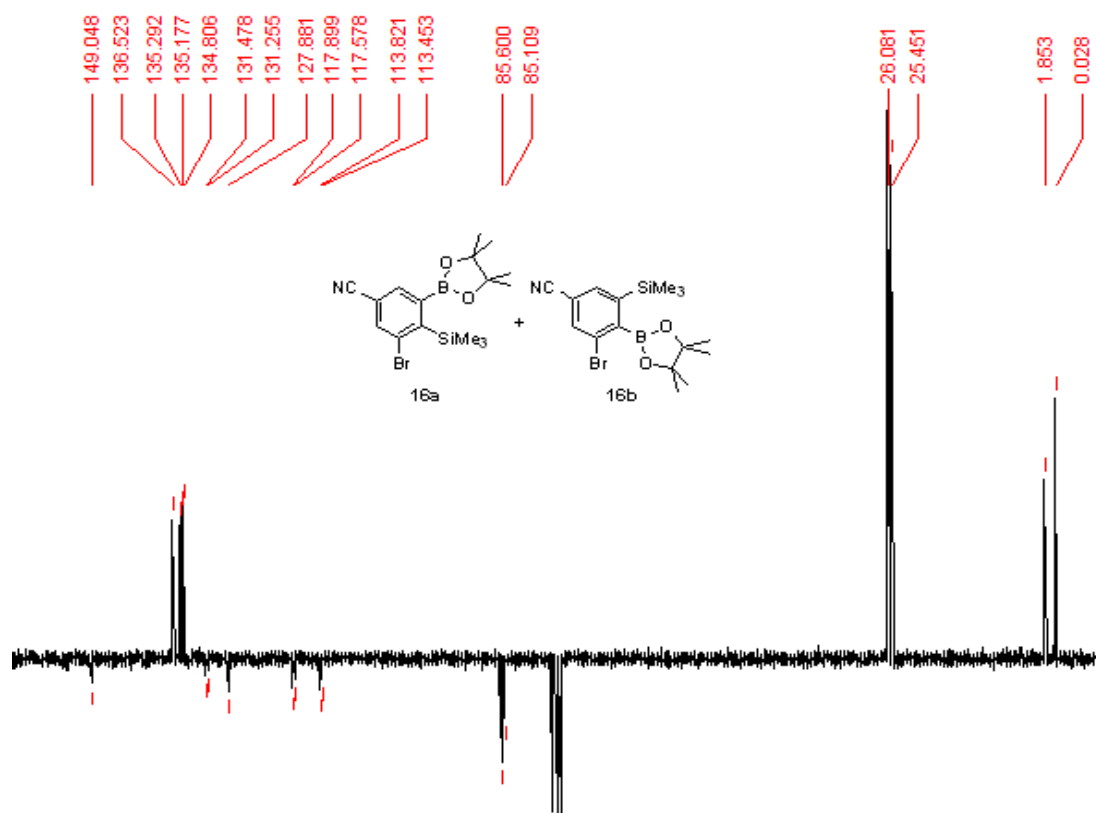

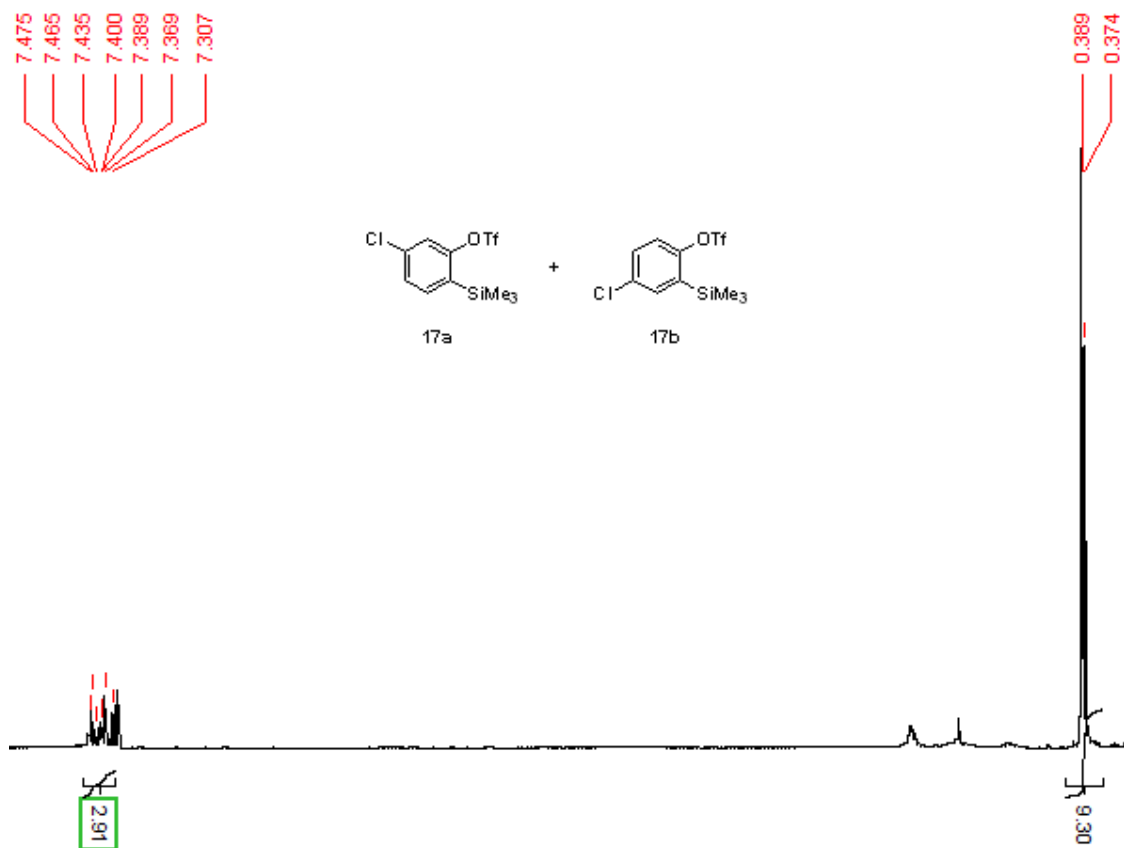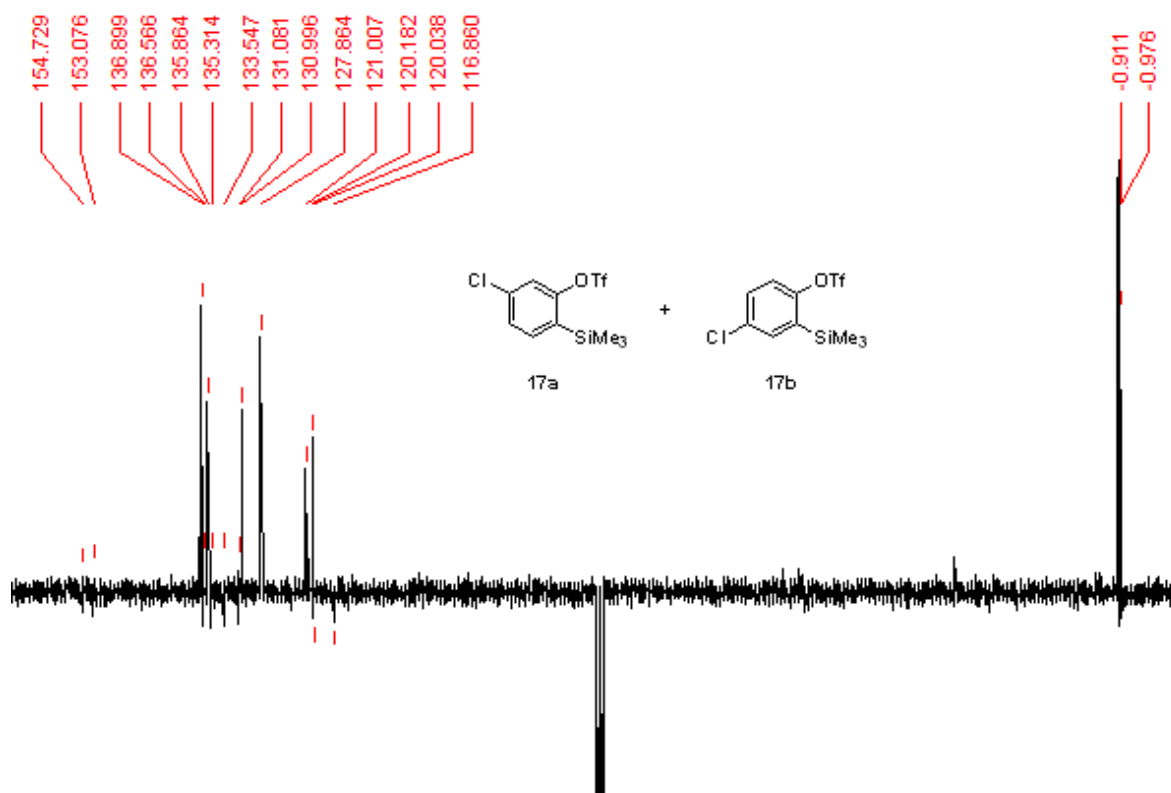

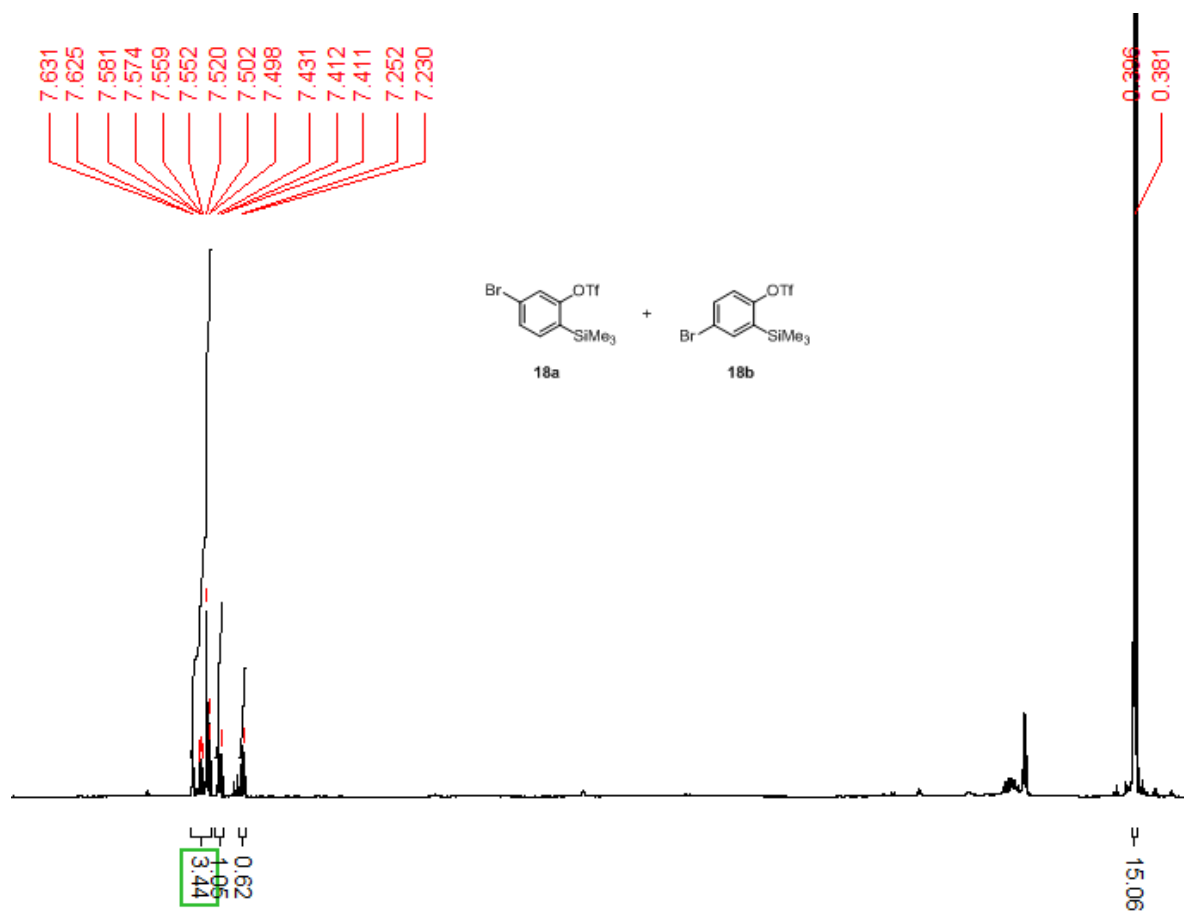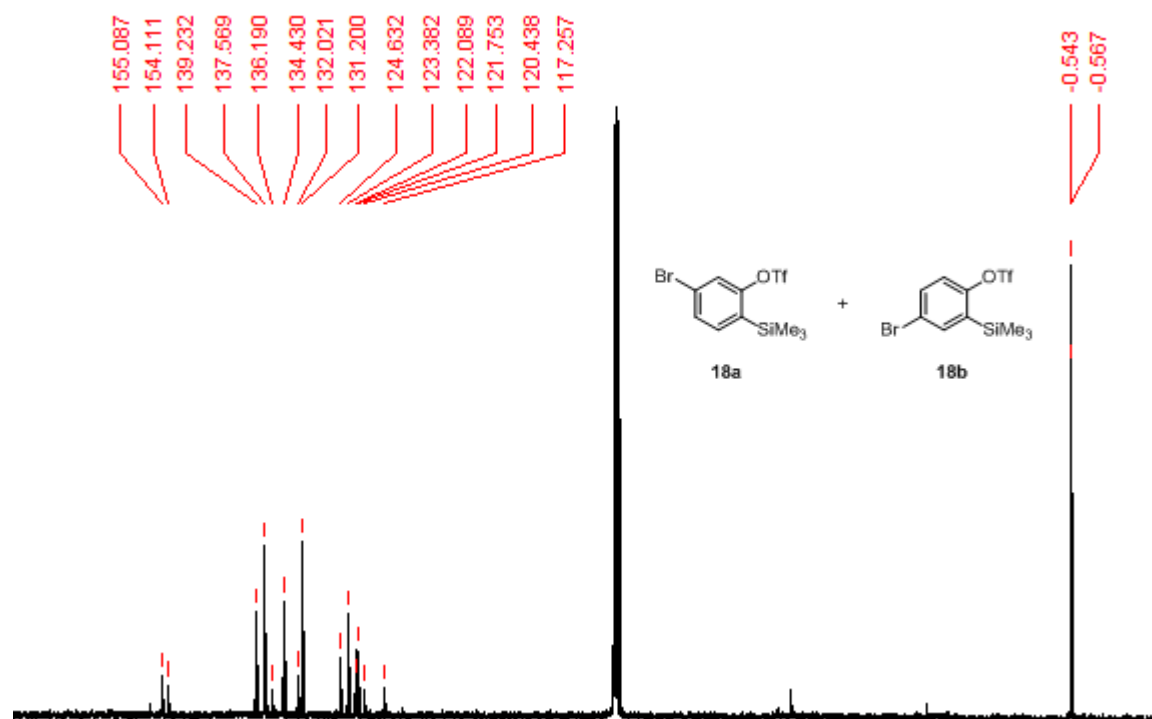



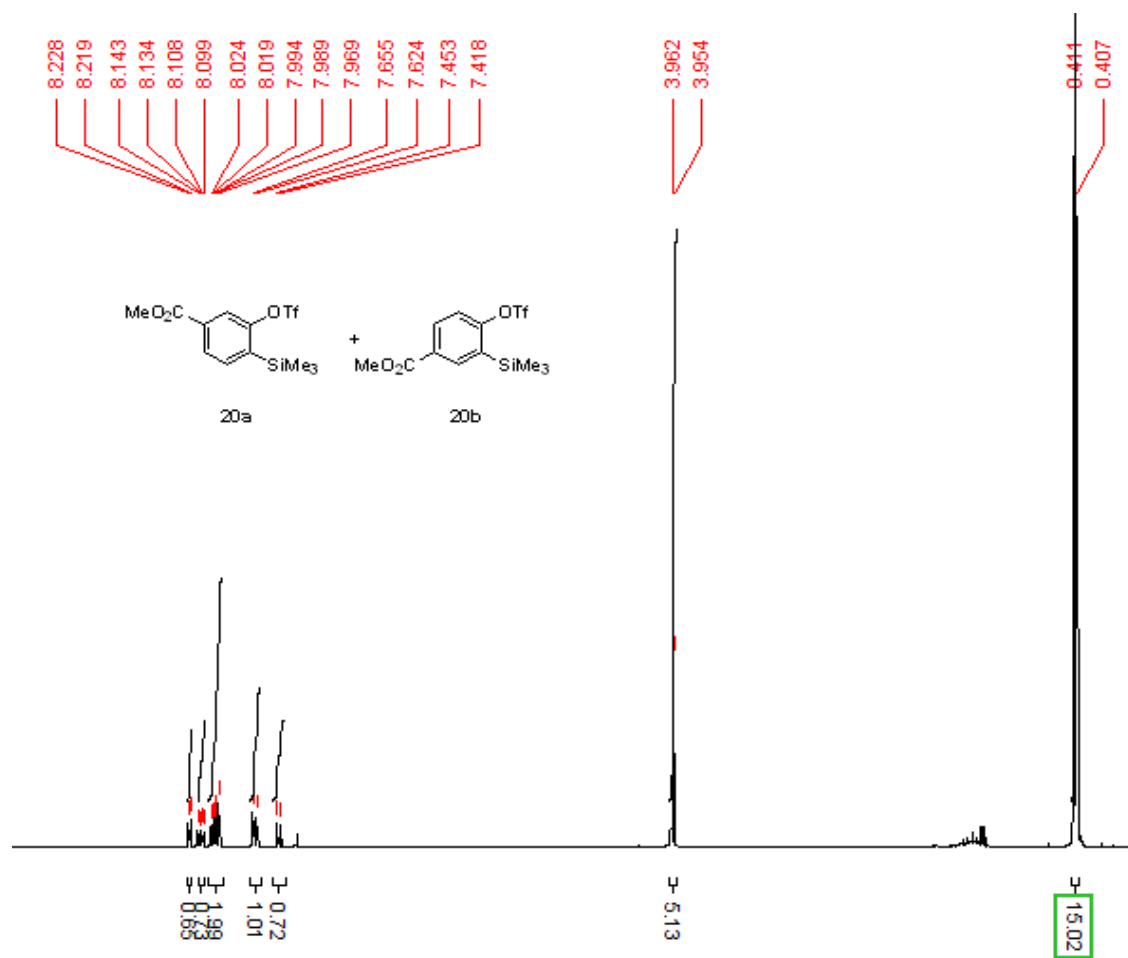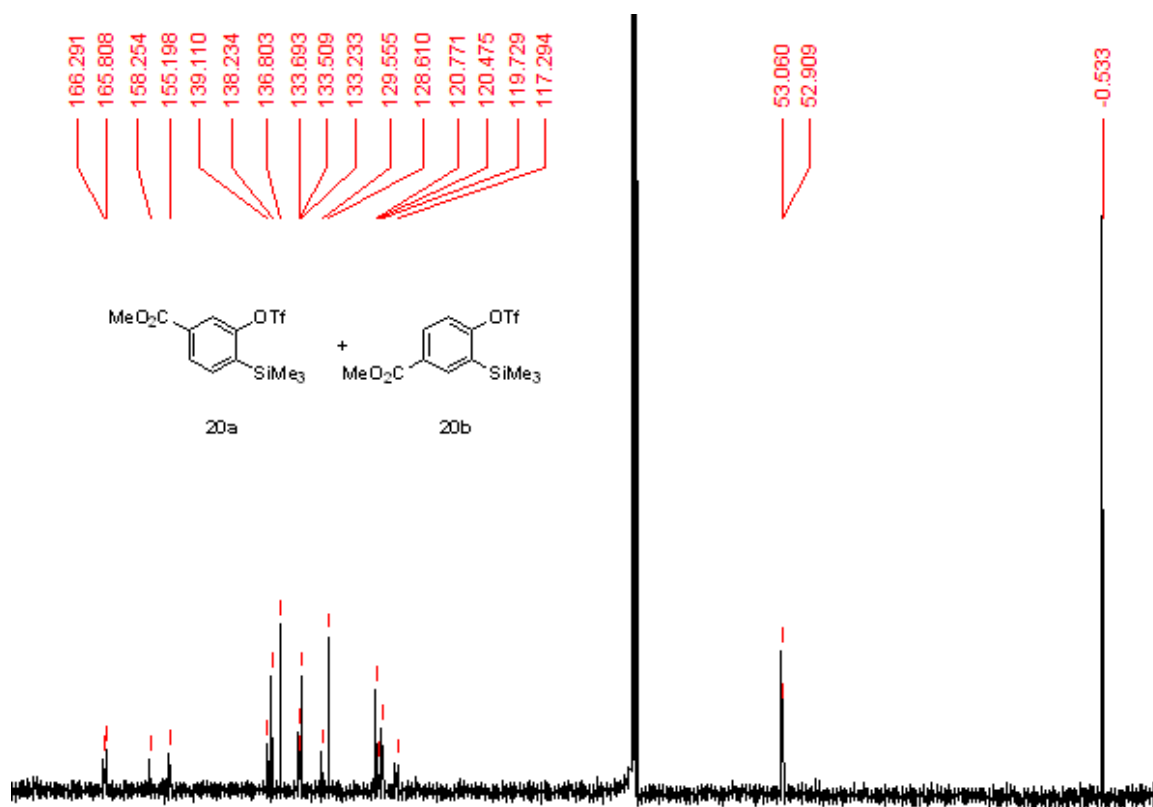

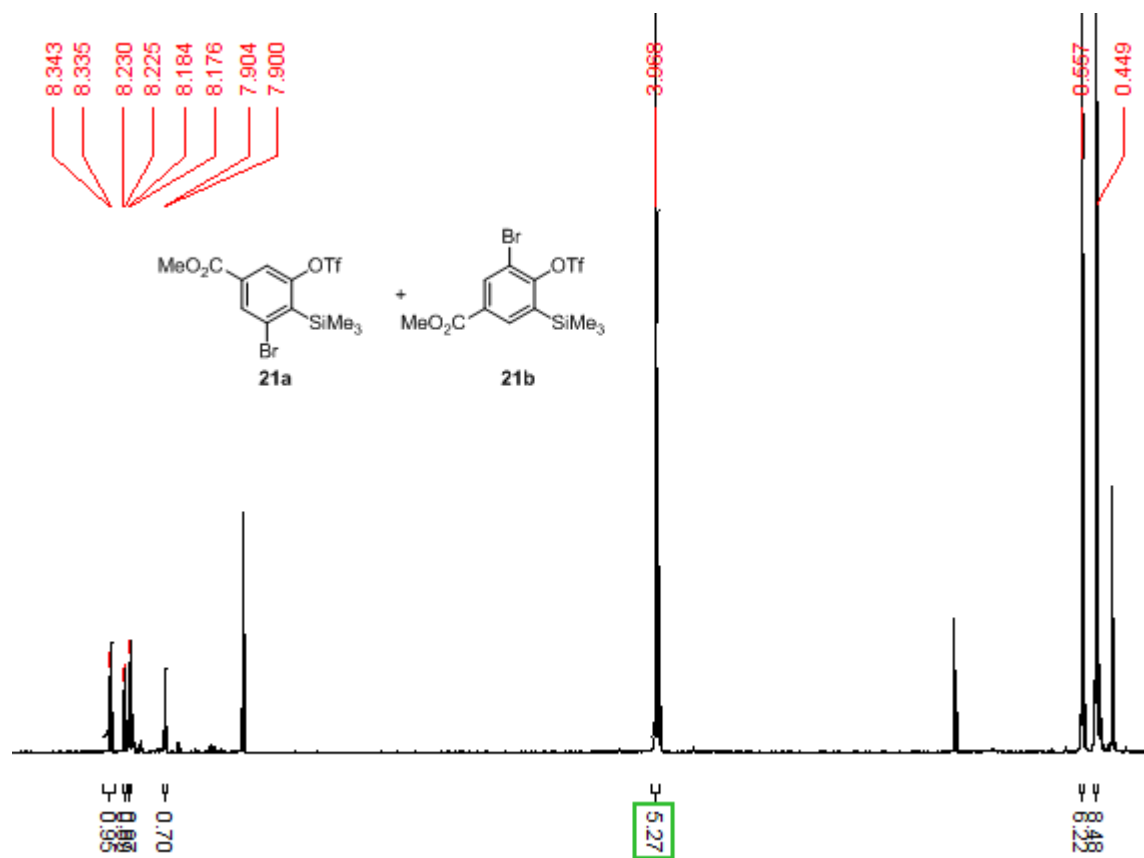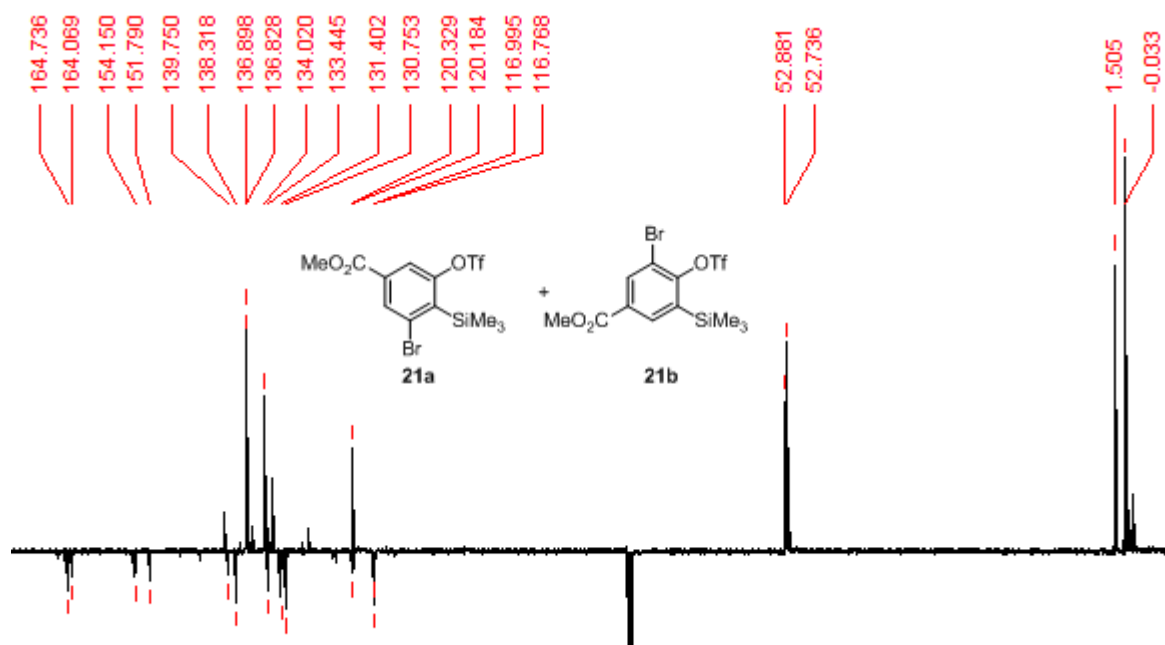

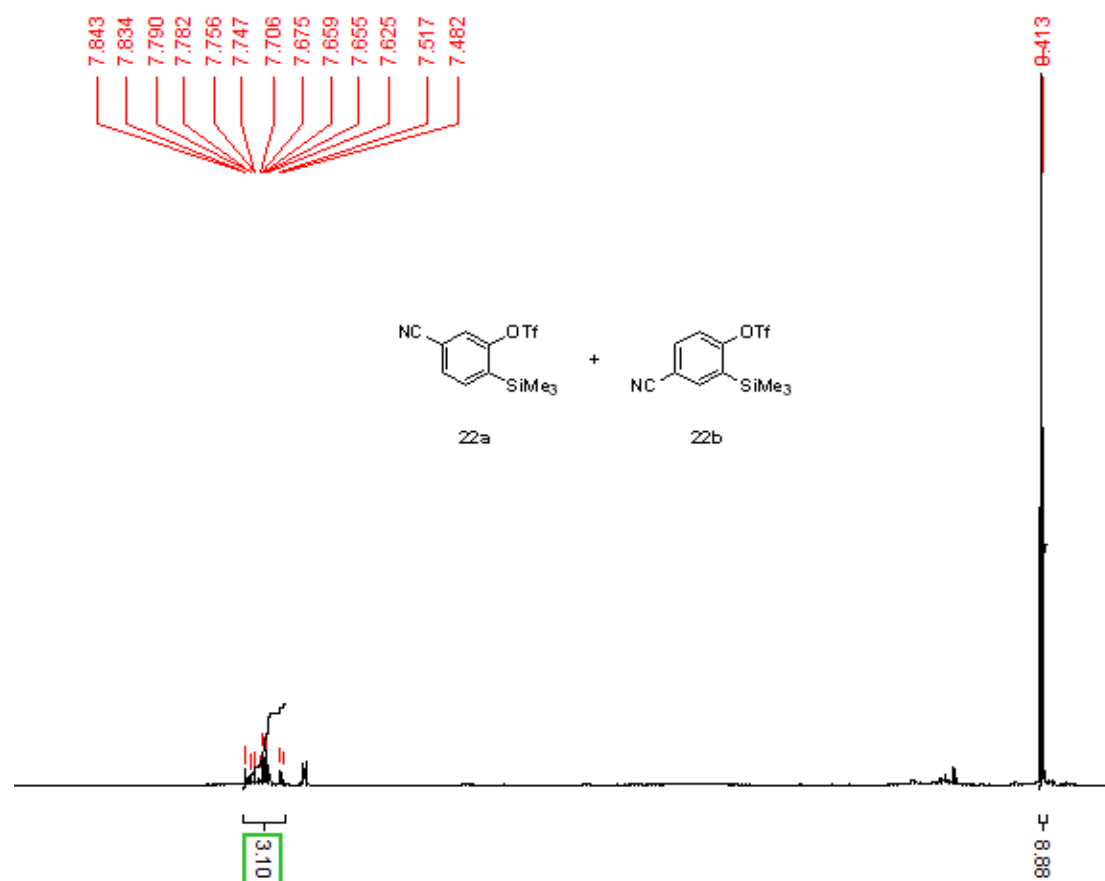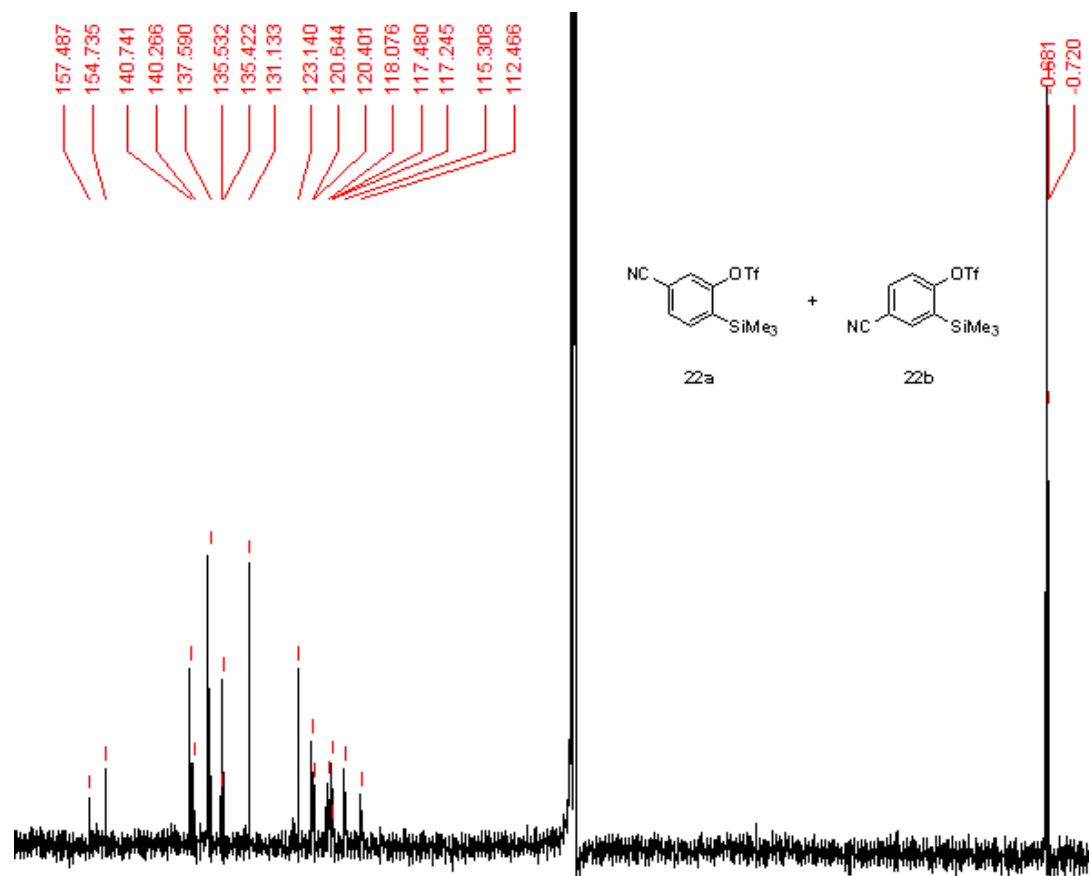

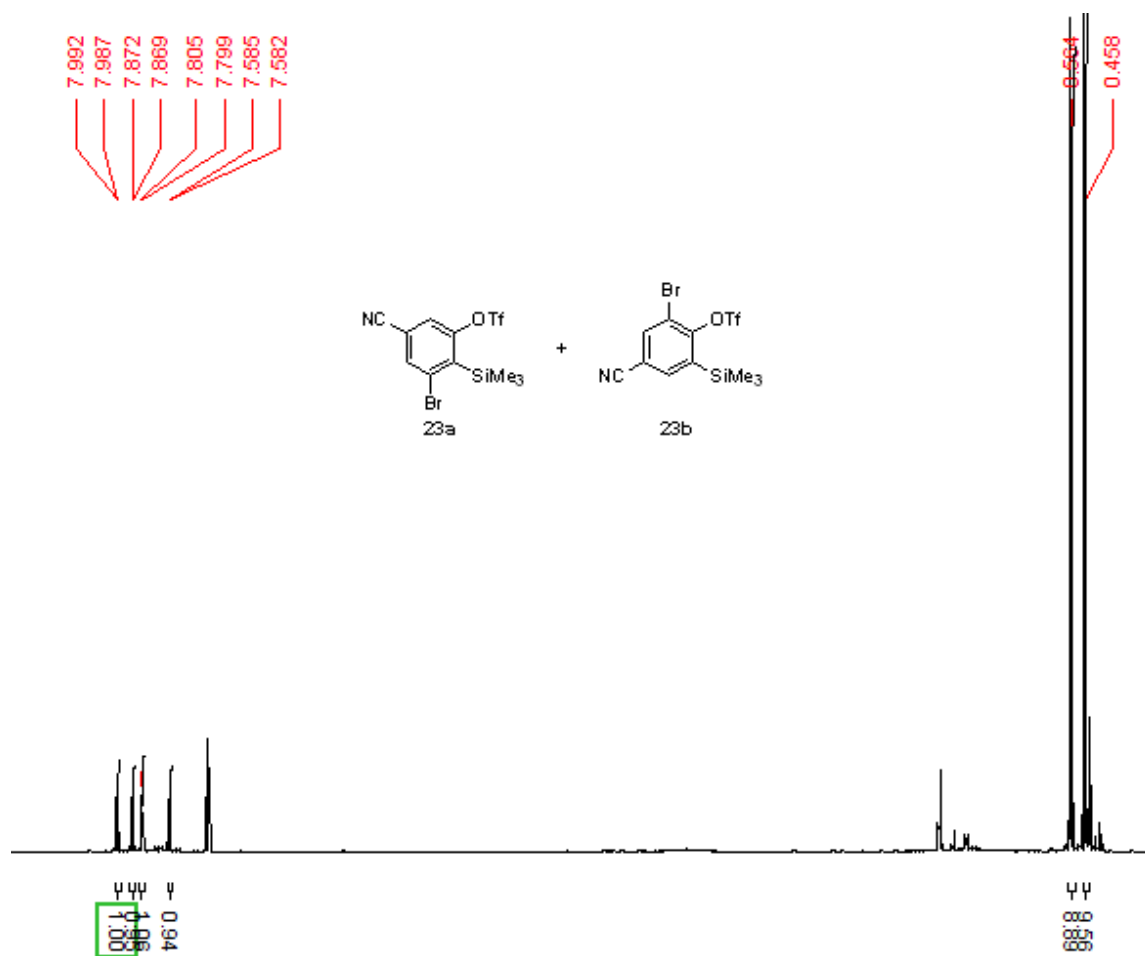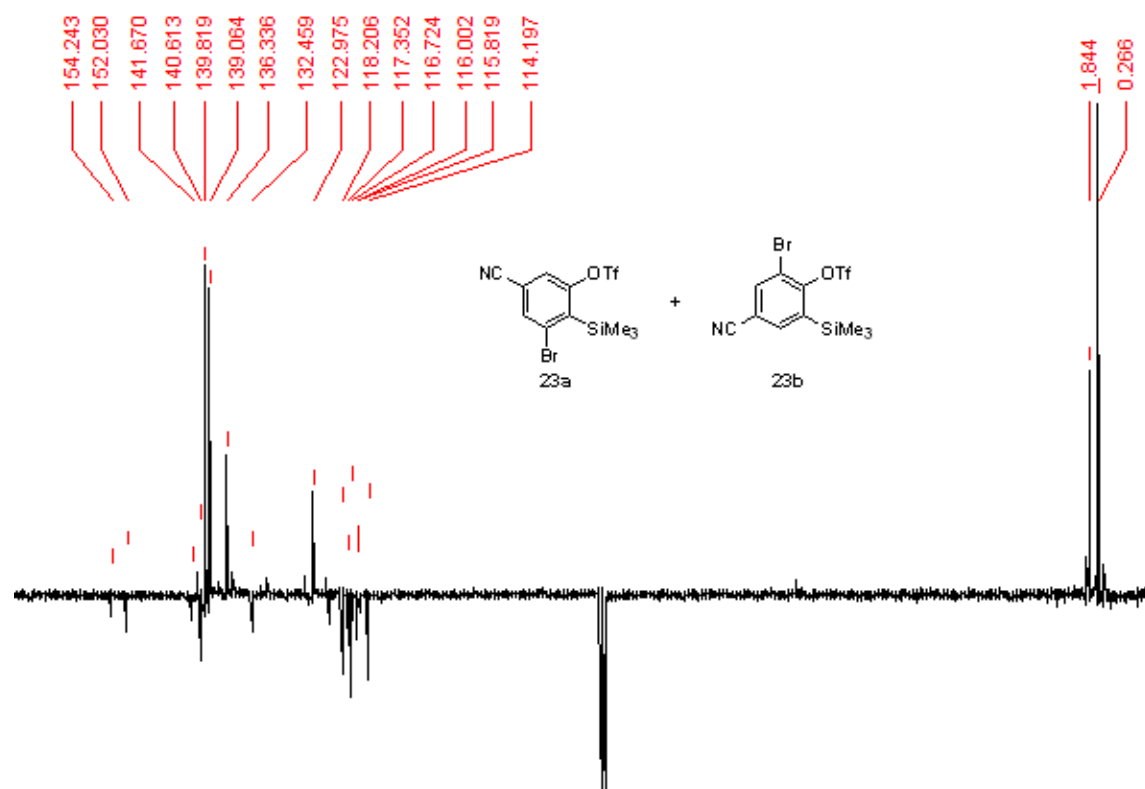



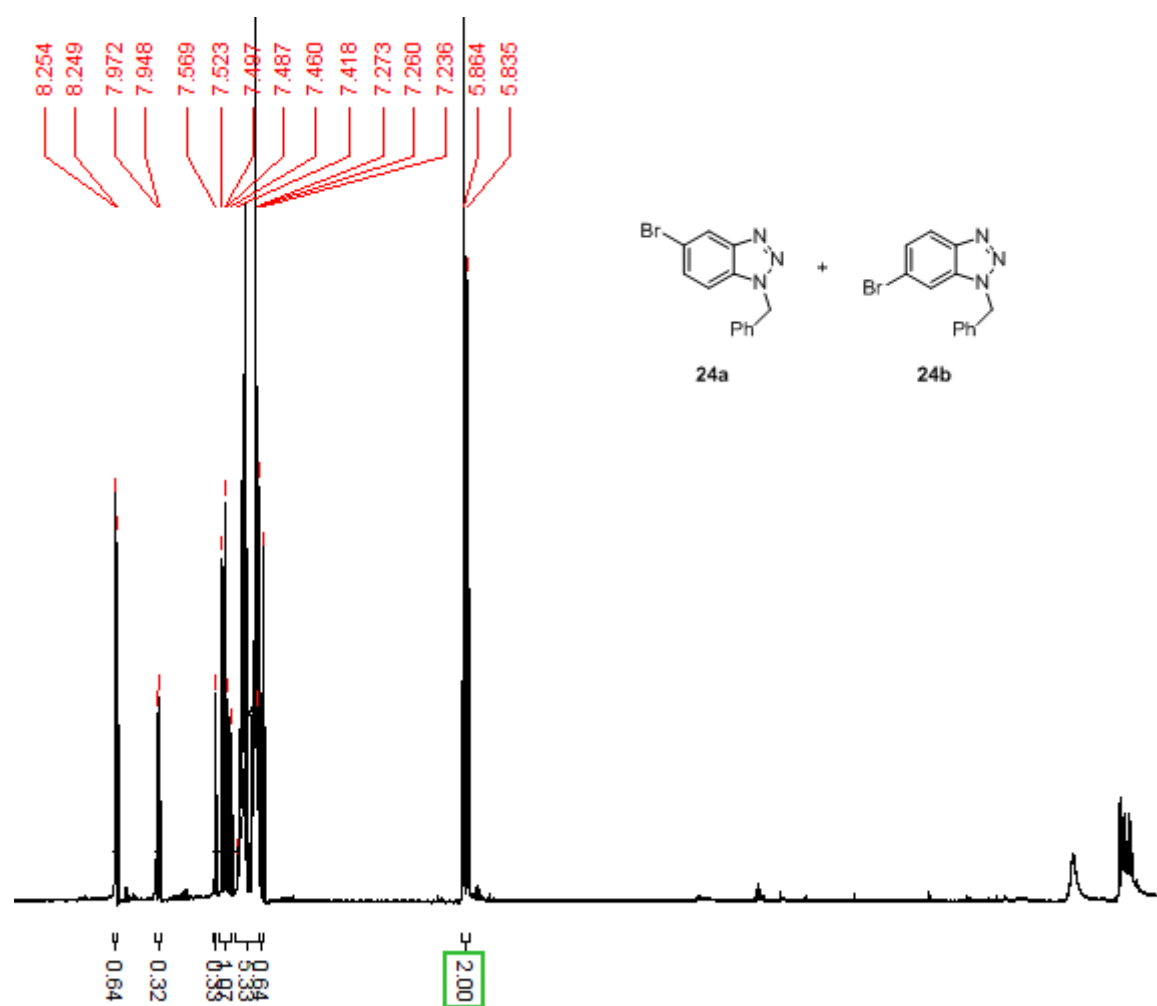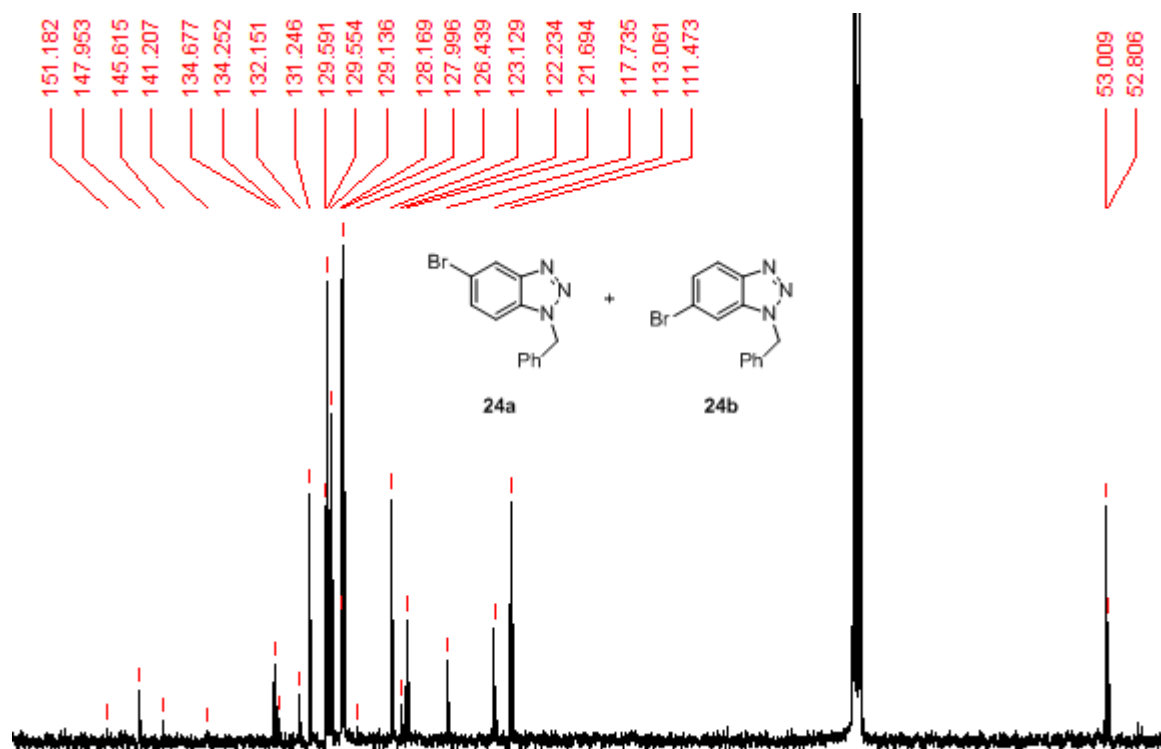

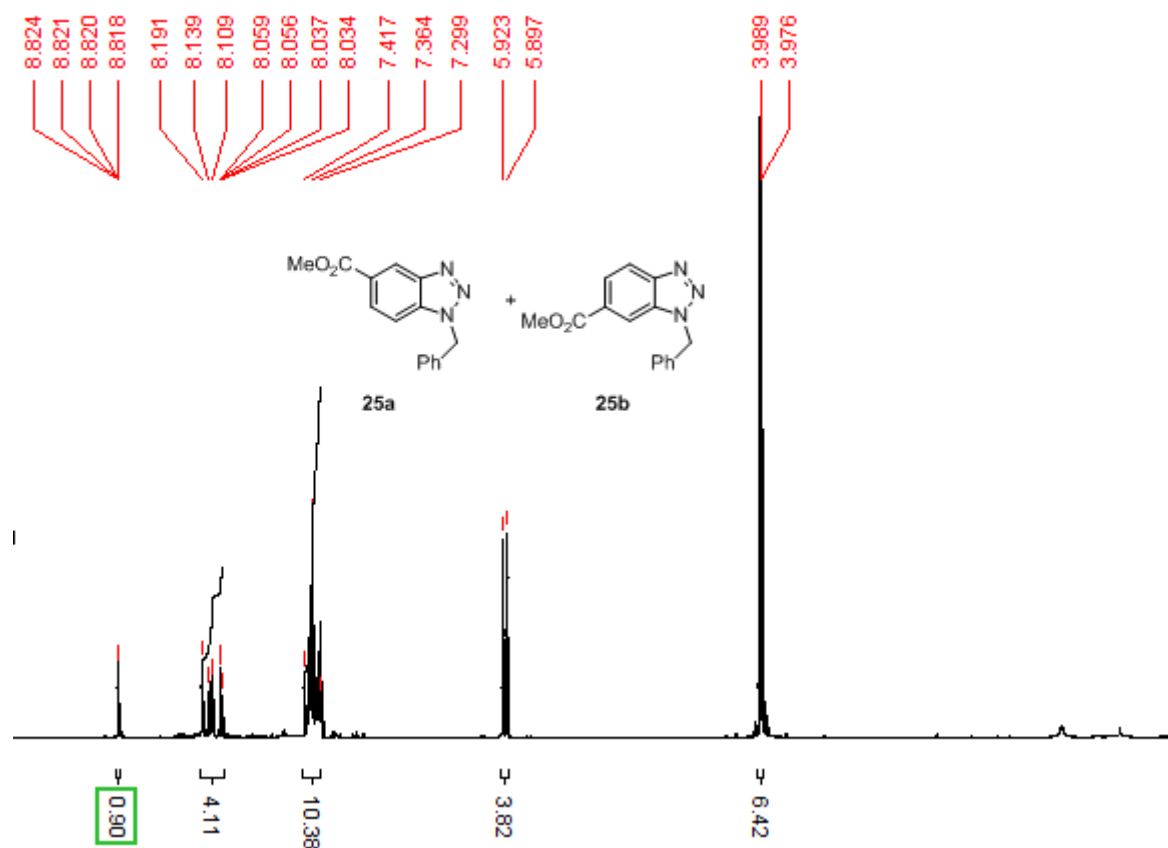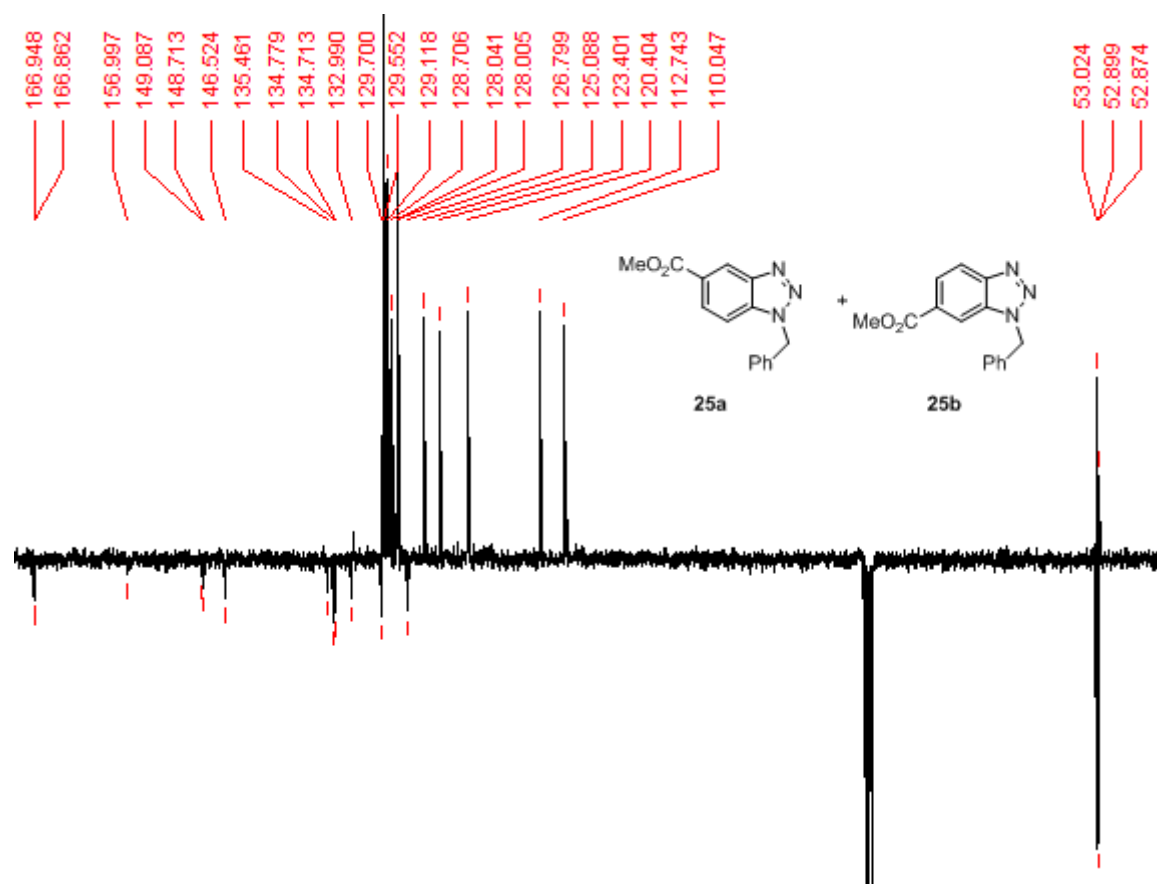

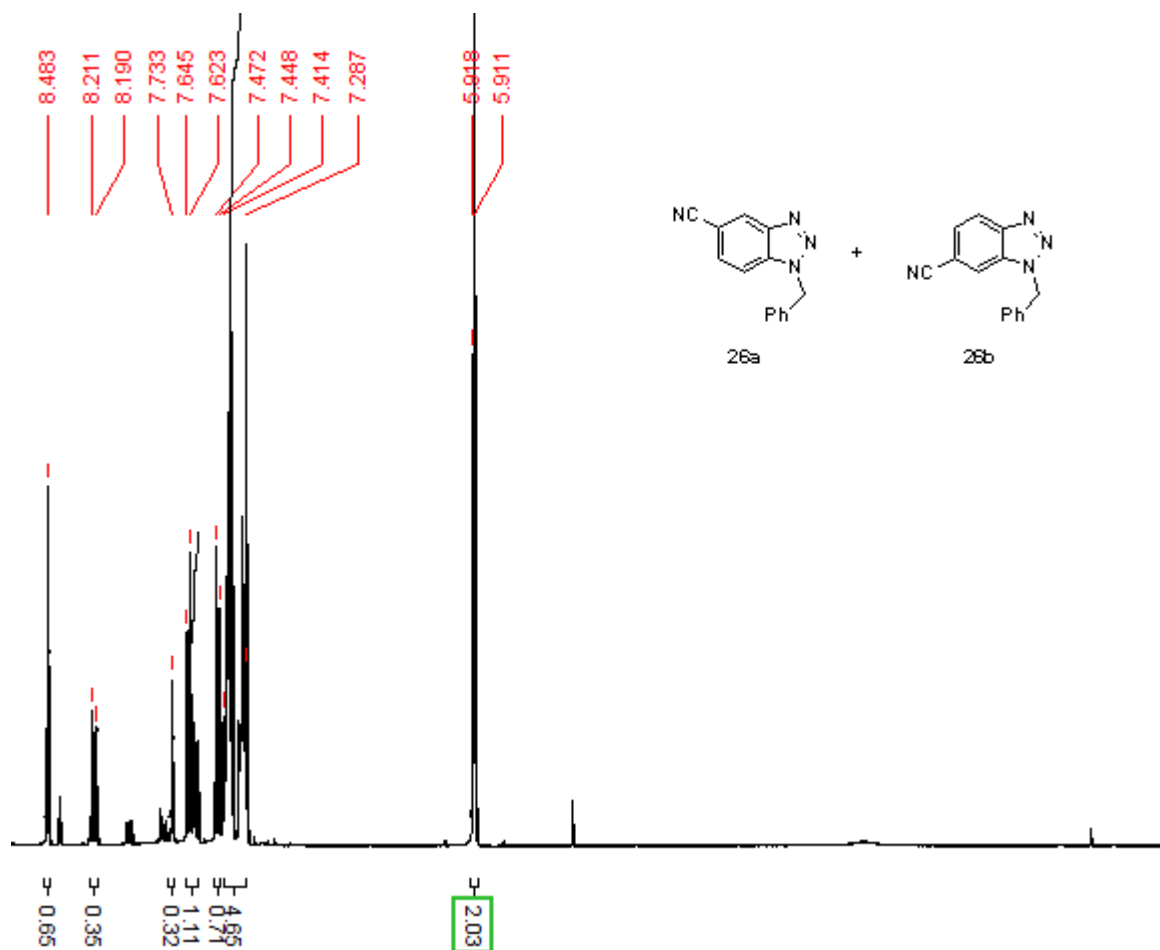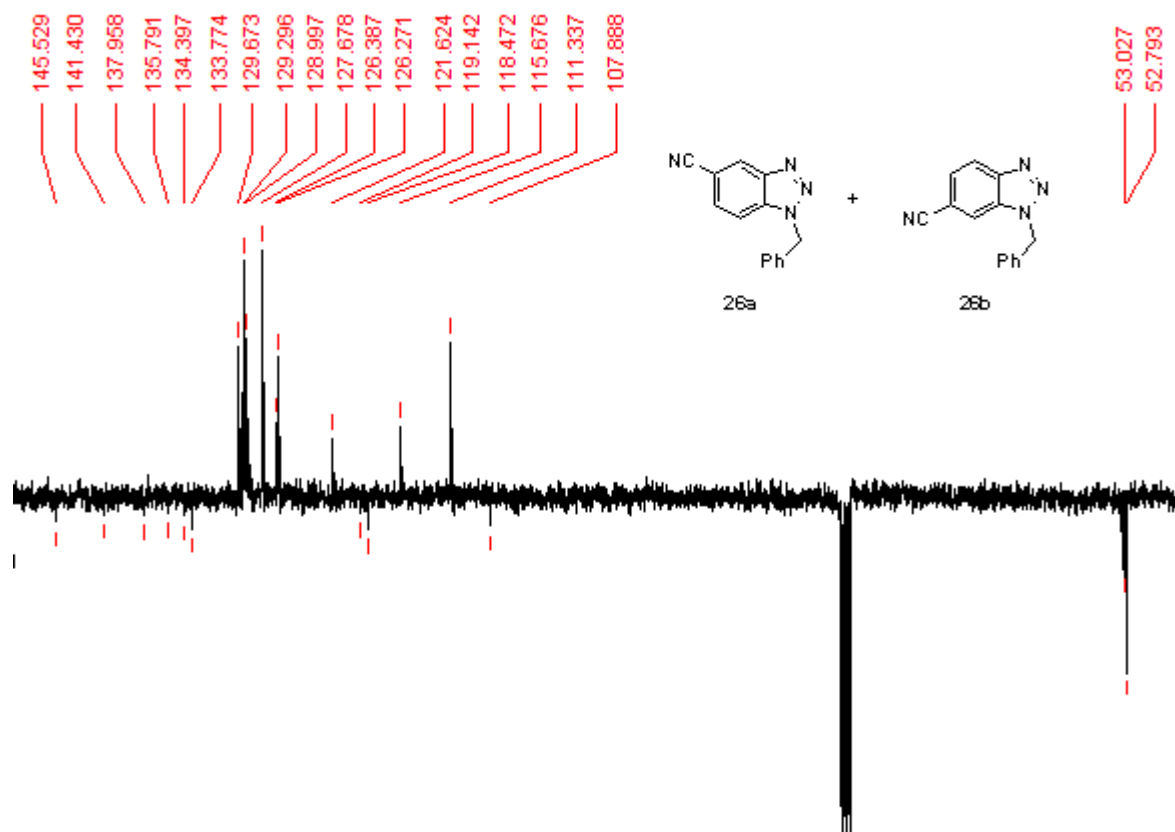

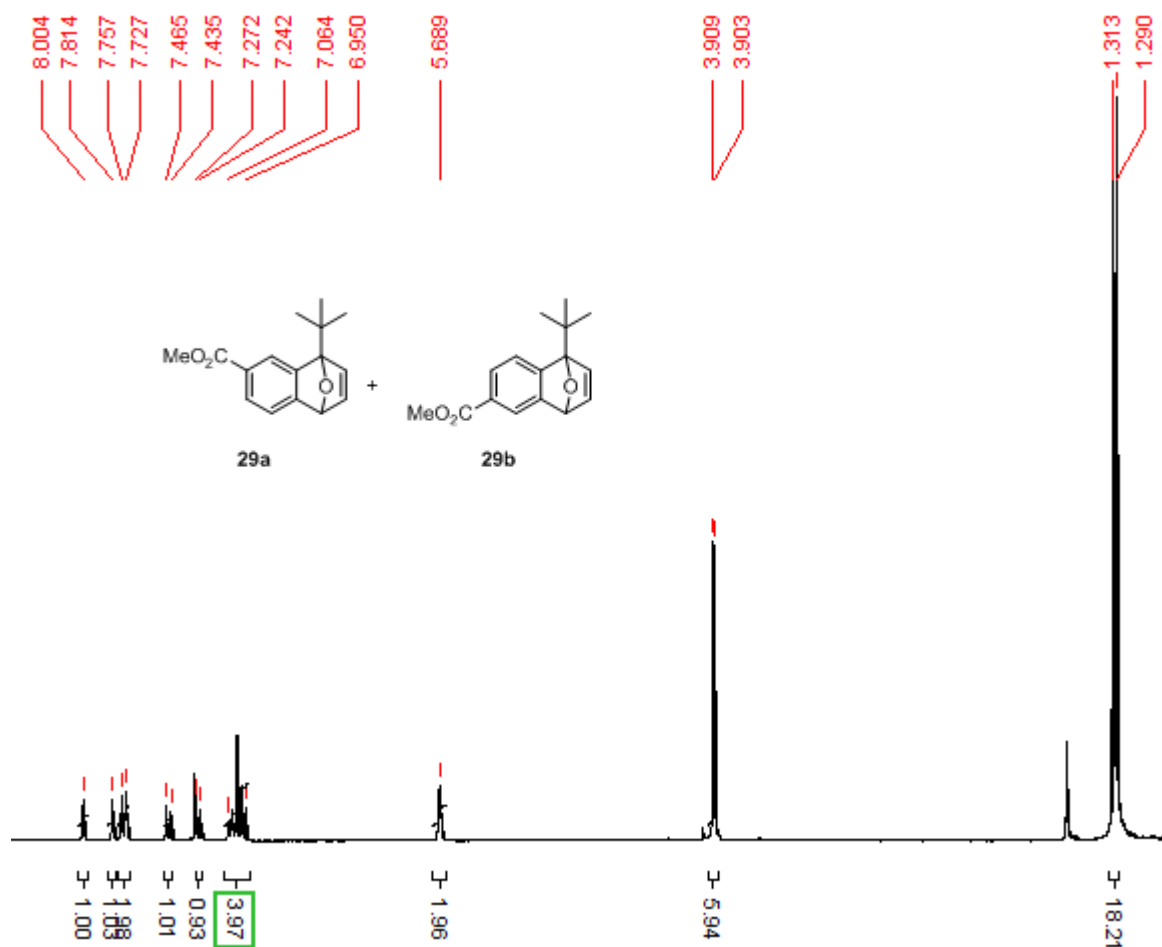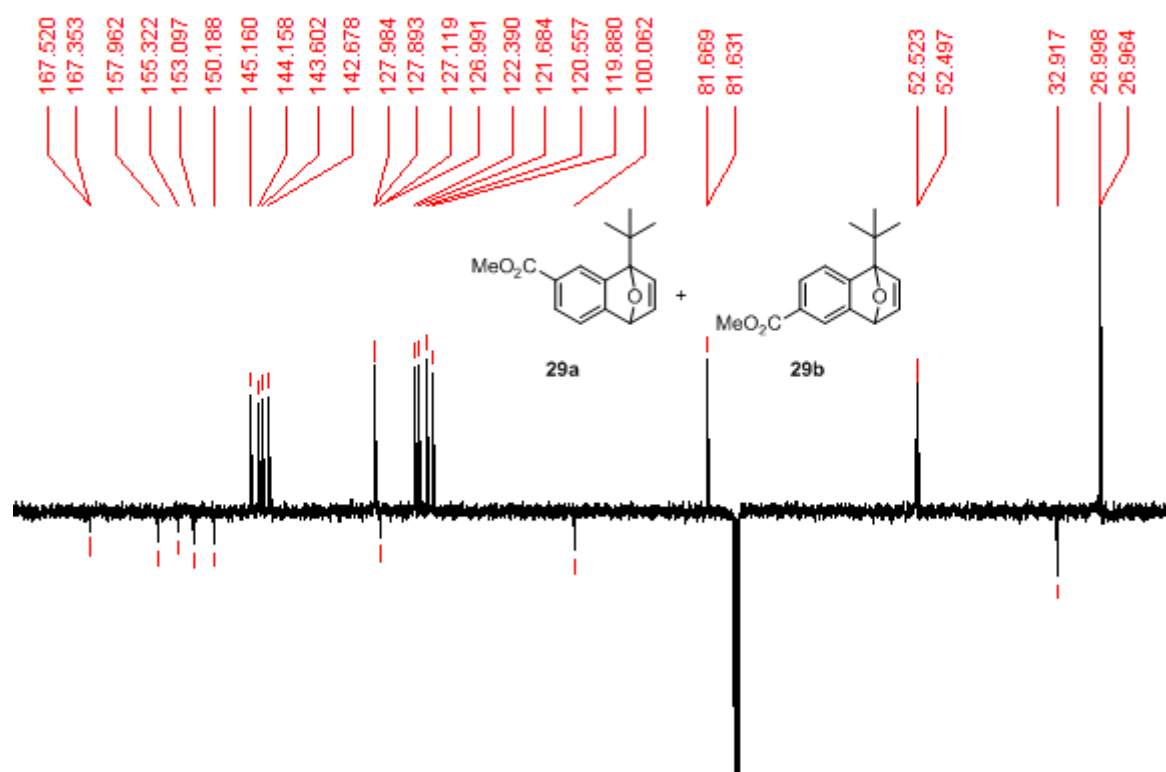

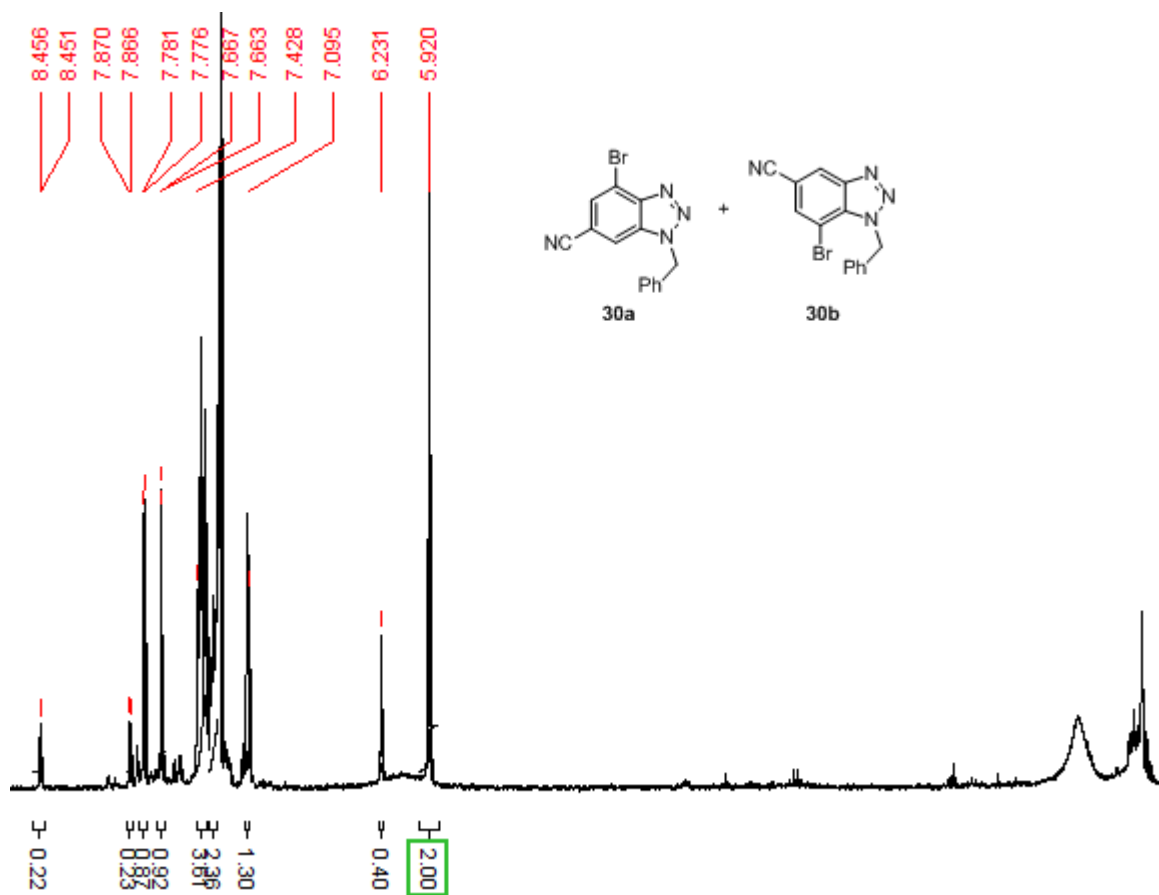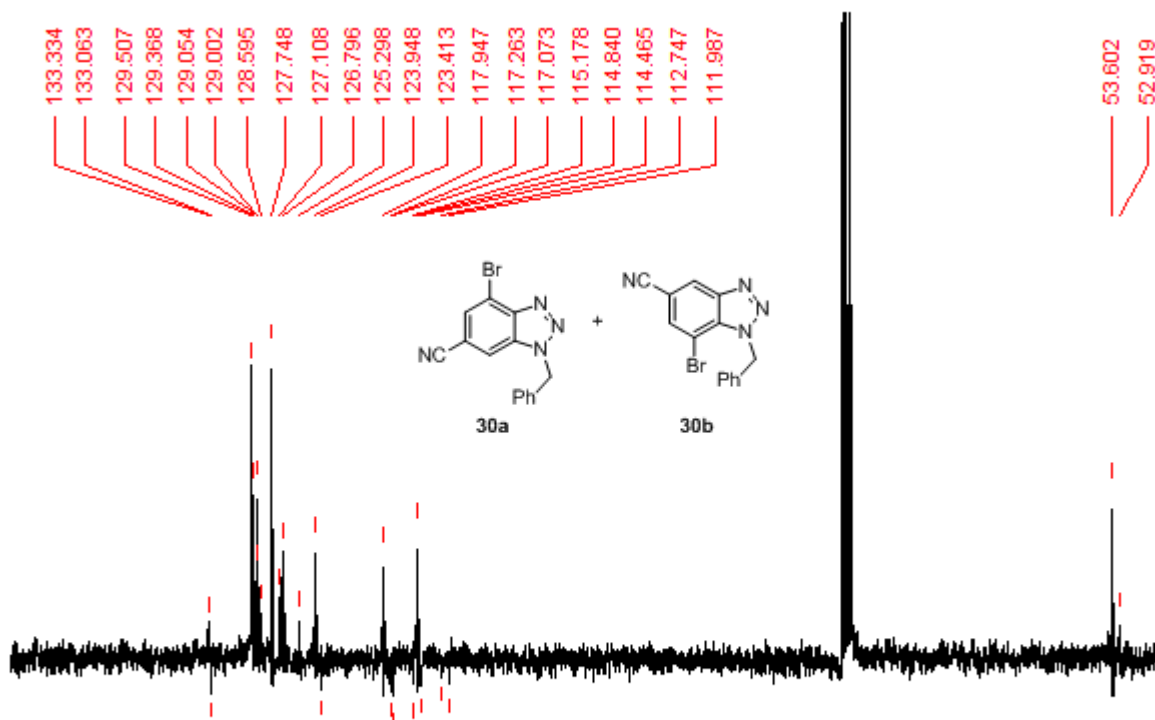

Supplement: c0cc01345e.pdf [file c0cc01345e.pdf]
